# Supplementary material for: DNA Methylation Patterns in the Social Spider, Stegodyphus dumicola
Source: MDPI journal article supplement (doi:10.3390/genes10020137), 2019-02-12

### Figure S3

Depth distribution and insert size distribution of the whole genome bisulfite sequencing reads (WGB) upon mapping to the reference genome. Here we use Betta population acclimated at 25 C° as an example.

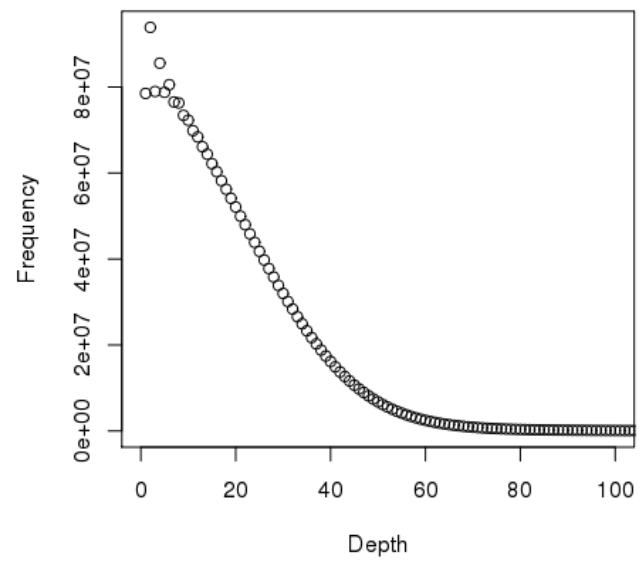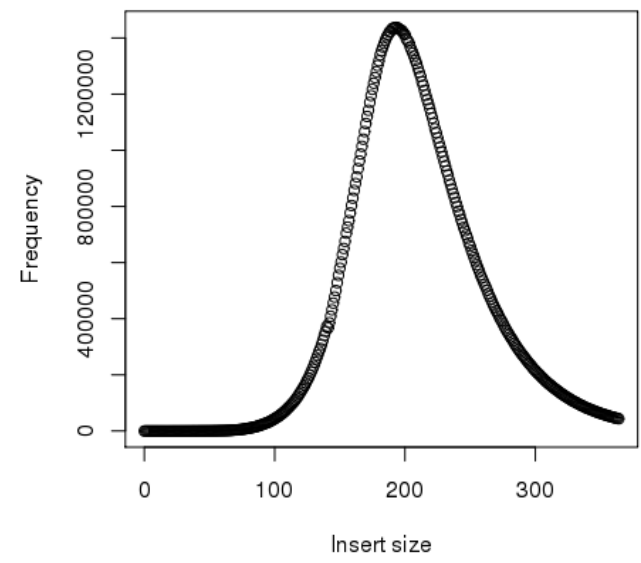

Supplement: s2 [file s2]
