# Supplementary material for: DNA Methylation Patterns in the Social Spider, Stegodyphus dumicola
Source: MDPI journal article supplement (doi:10.3390/genes10020137), 2019-02-12

## Figure S8

Differential gene expression, averaged across 10 nests, as a function of differential DNA methylation. Expression and DNA methylation differences was estimated among 10 nests from Betta (B25) and Karasburg (K25) that were acclimated at 25 degrees in the lab for 6 weeks. Each dot represent a gene that passed filtering (see Methods). All genes that are expressed in at least one individual are included.



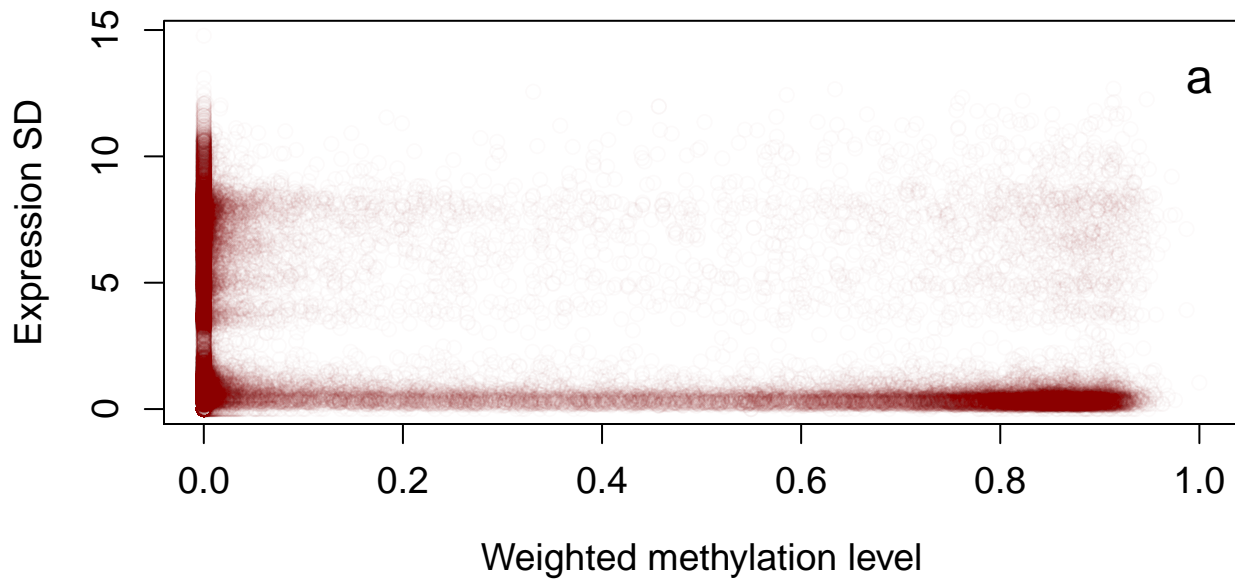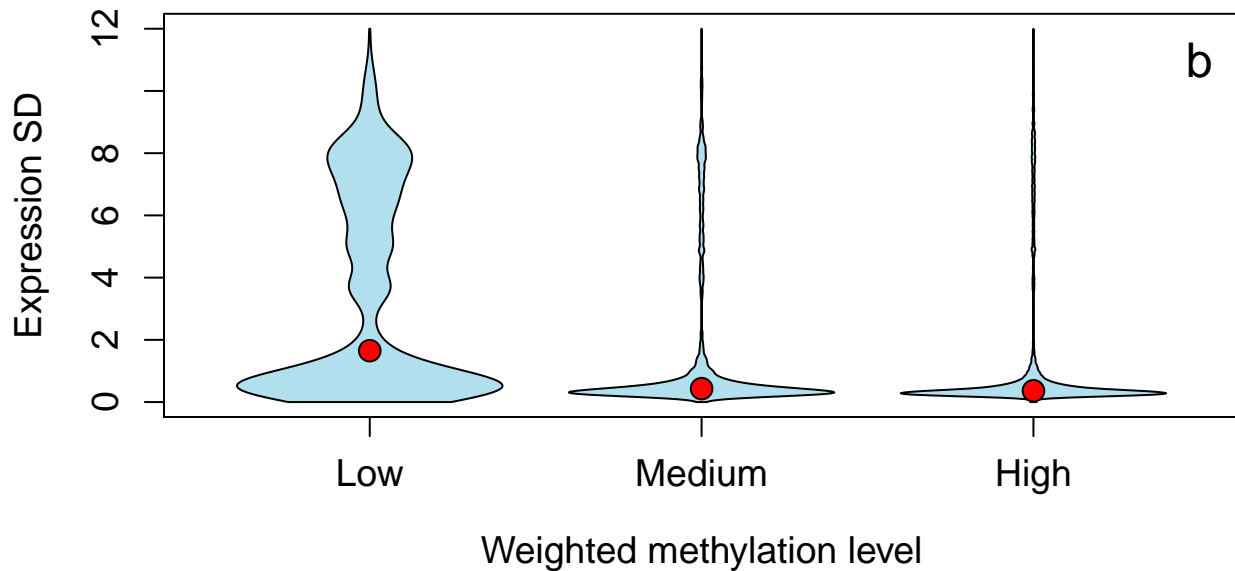

Supplement: s2 [file s2]
