# Supplementary material for: DNA Methylation Patterns in the Social Spider, Stegodyphus dumicola
Source: MDPI journal article supplement (doi:10.3390/genes10020137), 2019-02-12

## Figure S7

Relationships between methylation levels of genes and the overlapping transposable elements (DNA transposable elements, i.e. DNA TE, on the left and RNA transposable elements, i.e. RNA TE, on the right).

**DNA TE**

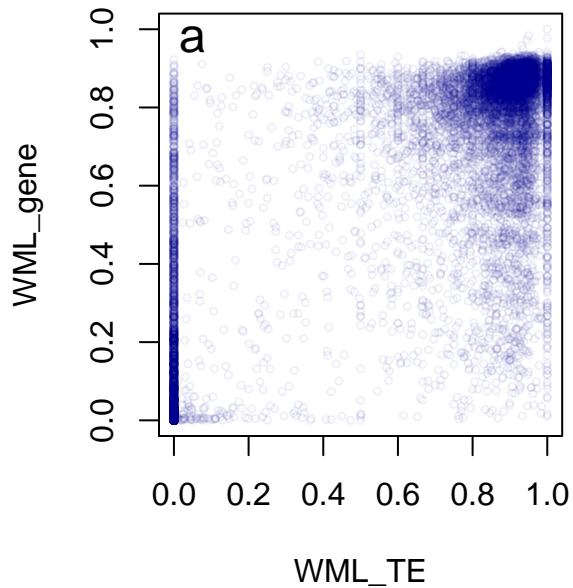

**RNA TE**

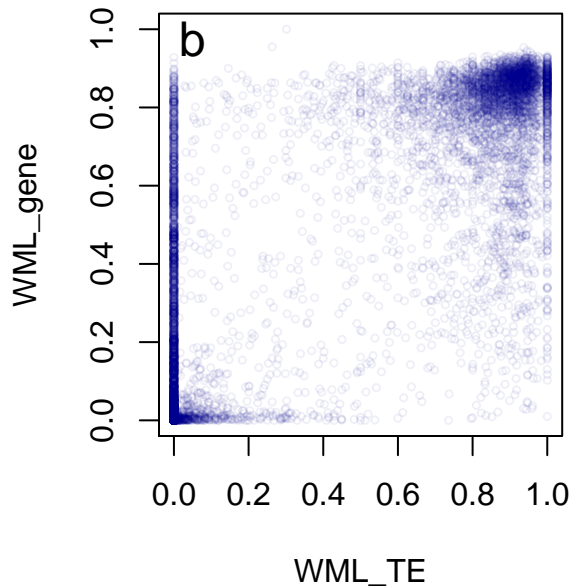

Supplement: s2 [file s2]
