# Supplementary material for: DNA Methylation Patterns in the Social Spider, Stegodyphus dumicola
Source: MDPI journal article supplement (doi:10.3390/genes10020137), 2019-02-12

## Figure S12

Neighbor-Joining (NJ) trees of DNMT1, DNMT2 and DNMT3. Sequences included are those identified in the gene lists and genomes of surveyed chelicerates and the insect sequences used for blast.

# DNMT1

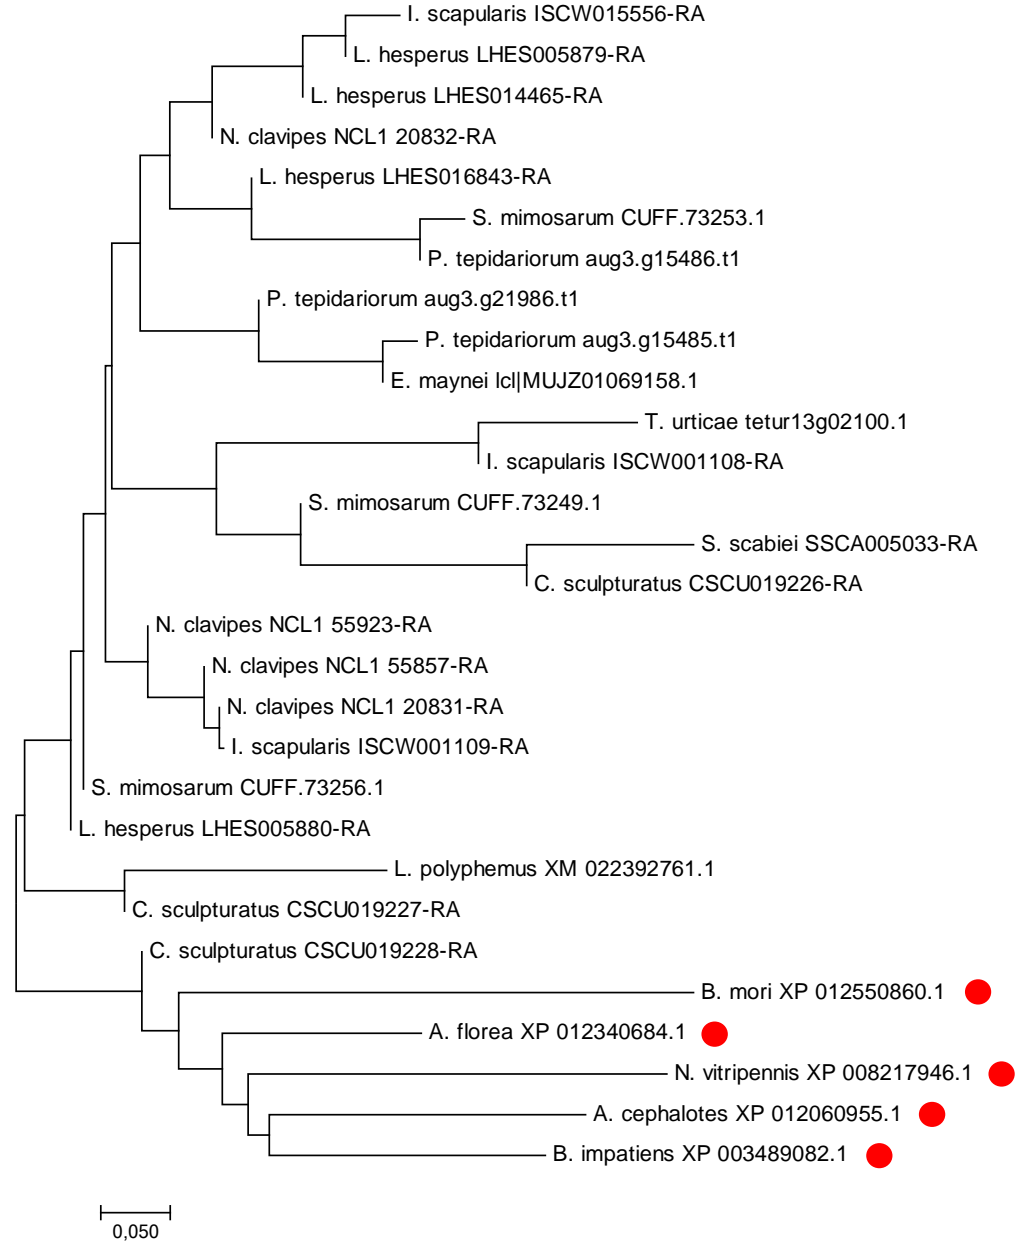

## DNMT2

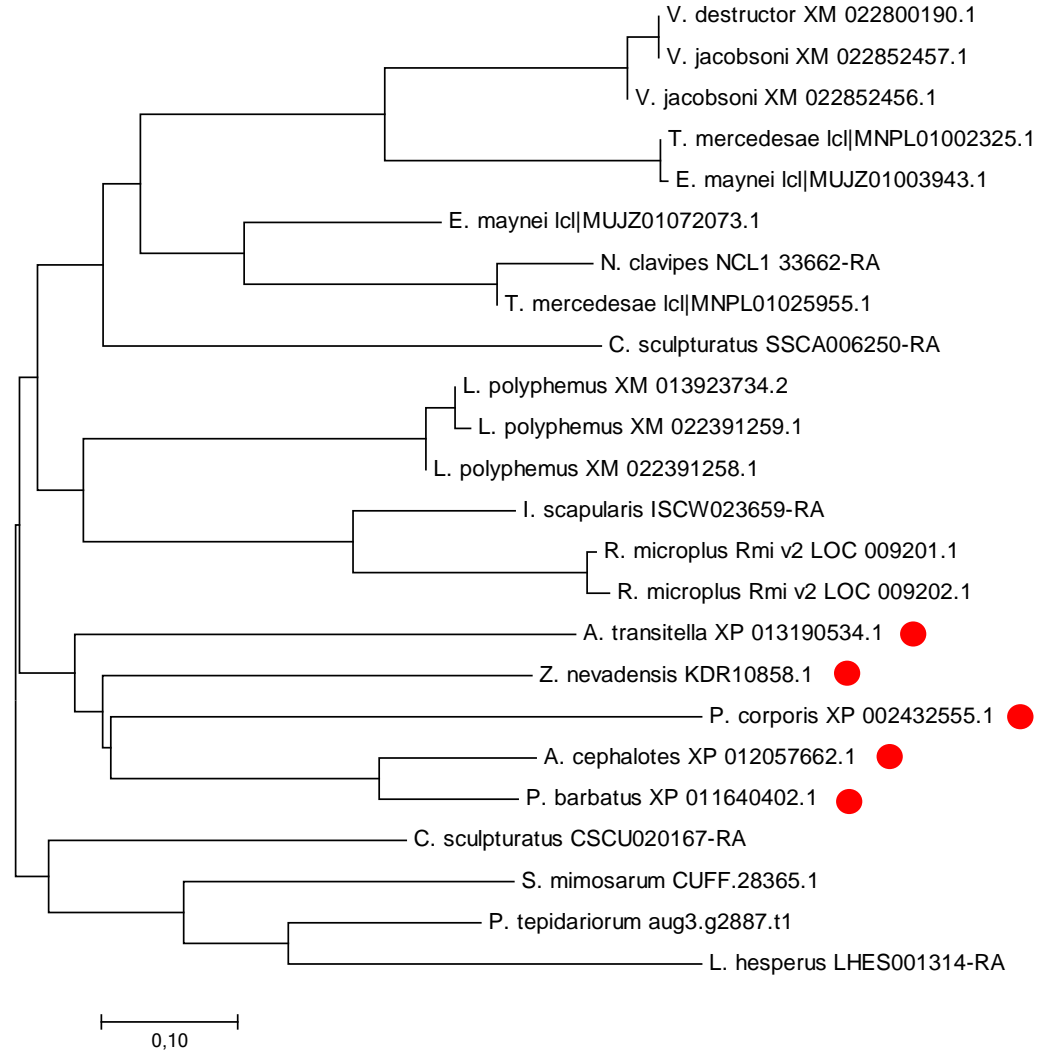

# DNMT3

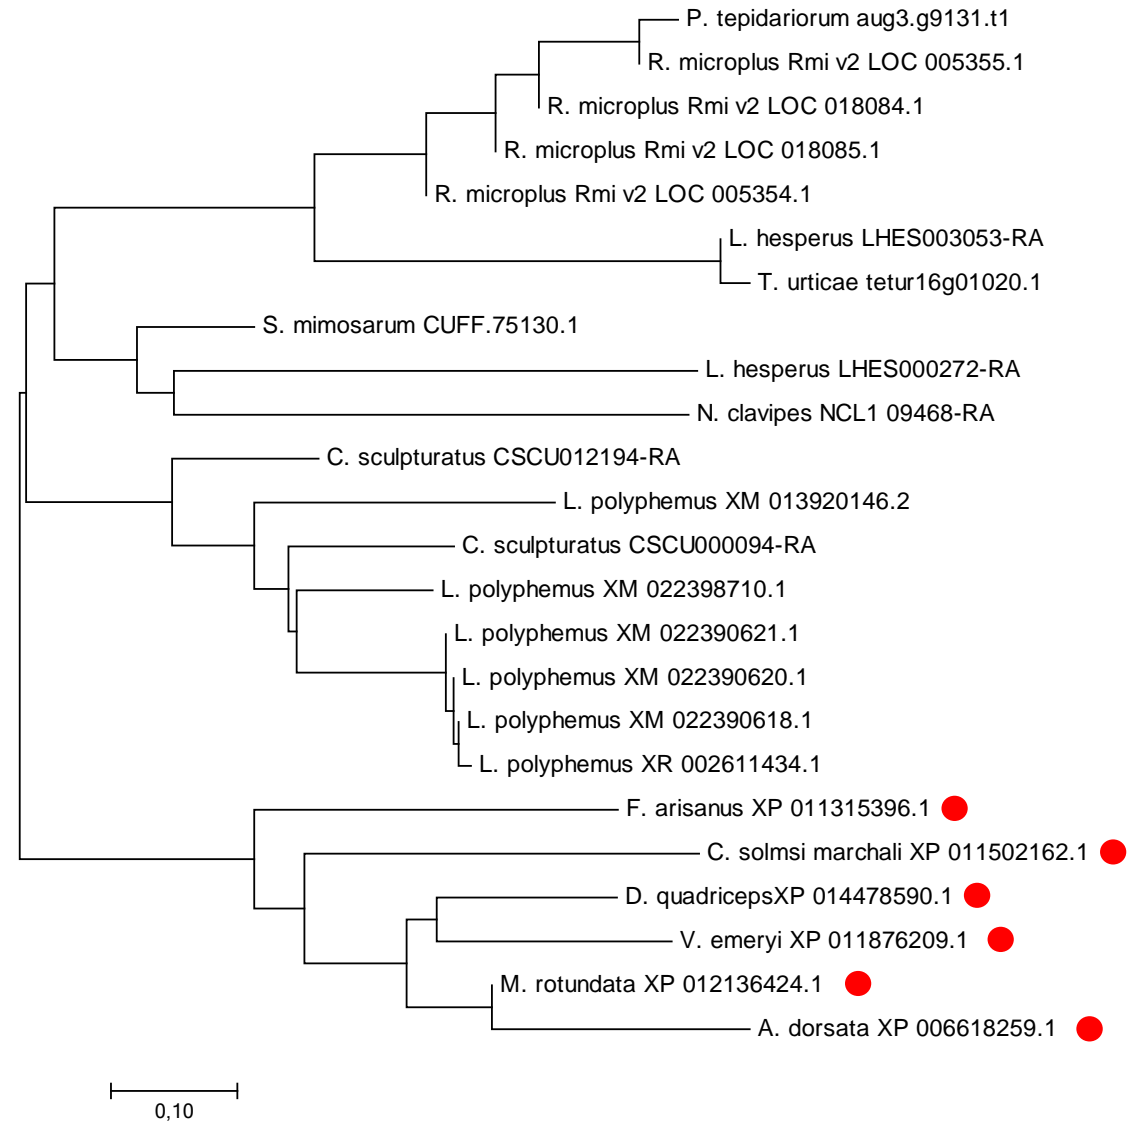

Supplement: s2 [file s2]
