# Supplementary material for: DNA Methylation Patterns in the Social Spider, Stegodyphus dumicola
Source: MDPI journal article supplement (doi:10.3390/genes10020137), 2019-02-12
Supplement: s2 [file s2]

## Figure S11

Domain types identified using SMART (<http://smart.embl-heidelberg.de>) in DNMTs found in all studied chelicerate genome sequences.

DNMT type

|       |
|-------|
| DNMT1 |
| DNMT2 |
| DNMT3 |

Domain type

RFD

BAH

RING

Catalytic

CXXC

PWWP

PHD

CFT

*S. mimosarum*

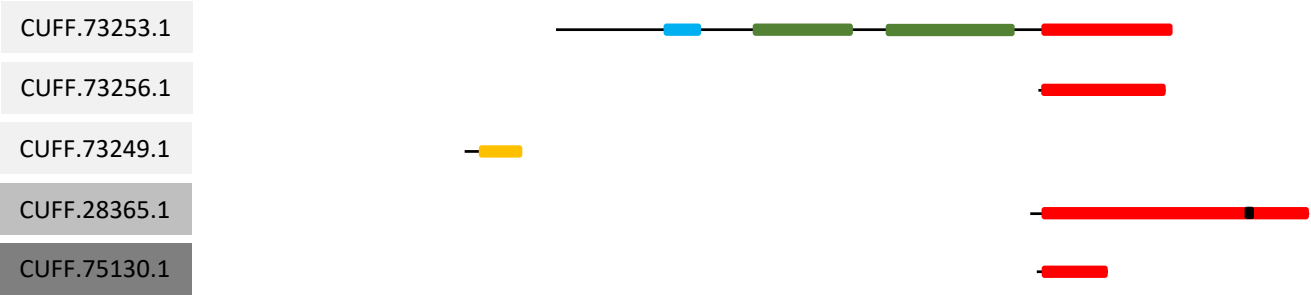

*P. tepidariorum*

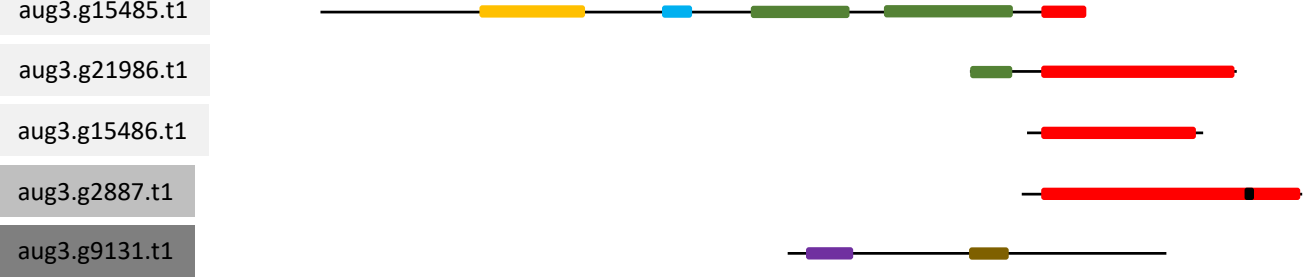

*P. hesperus*

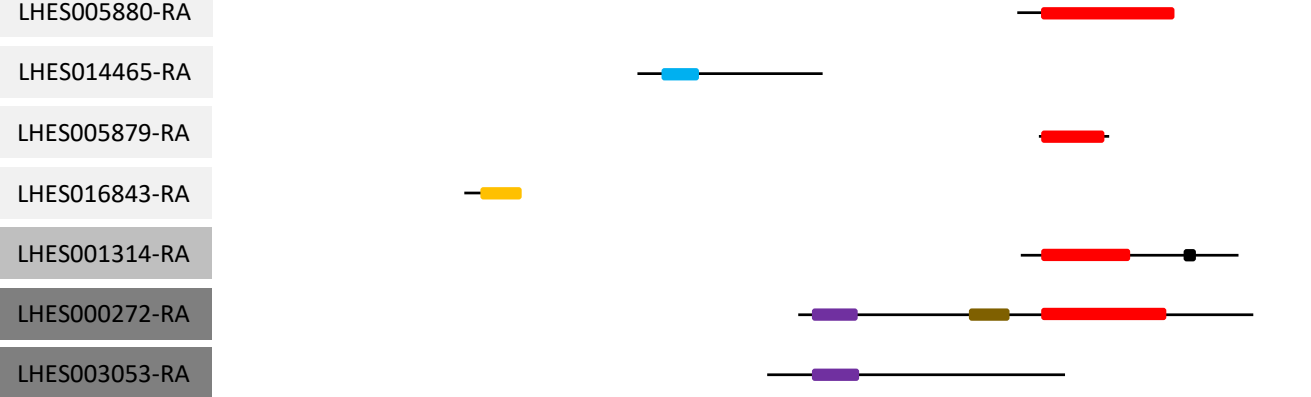

*N. clavipes*

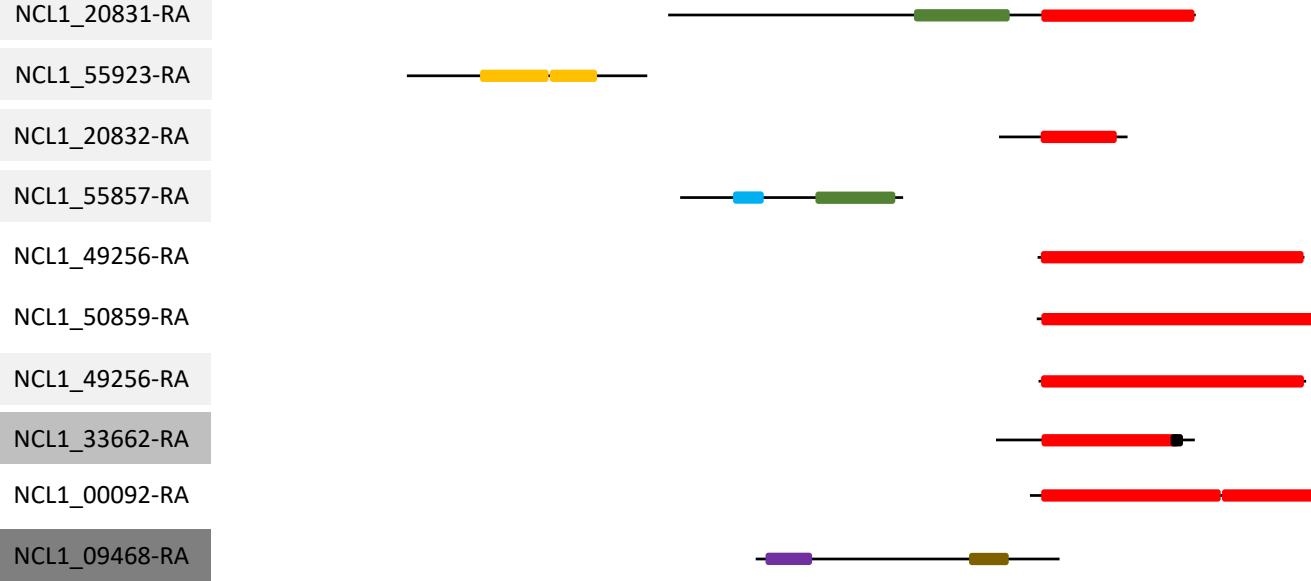

*C. sculpturatus*

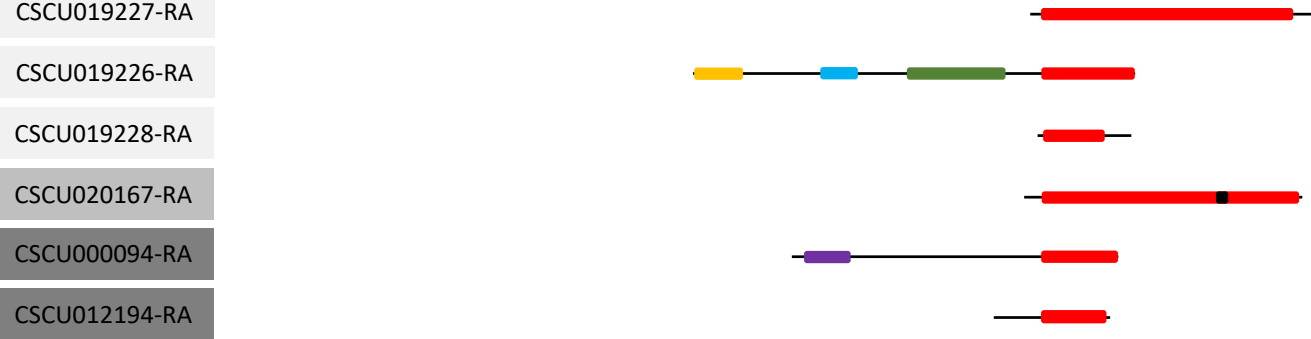

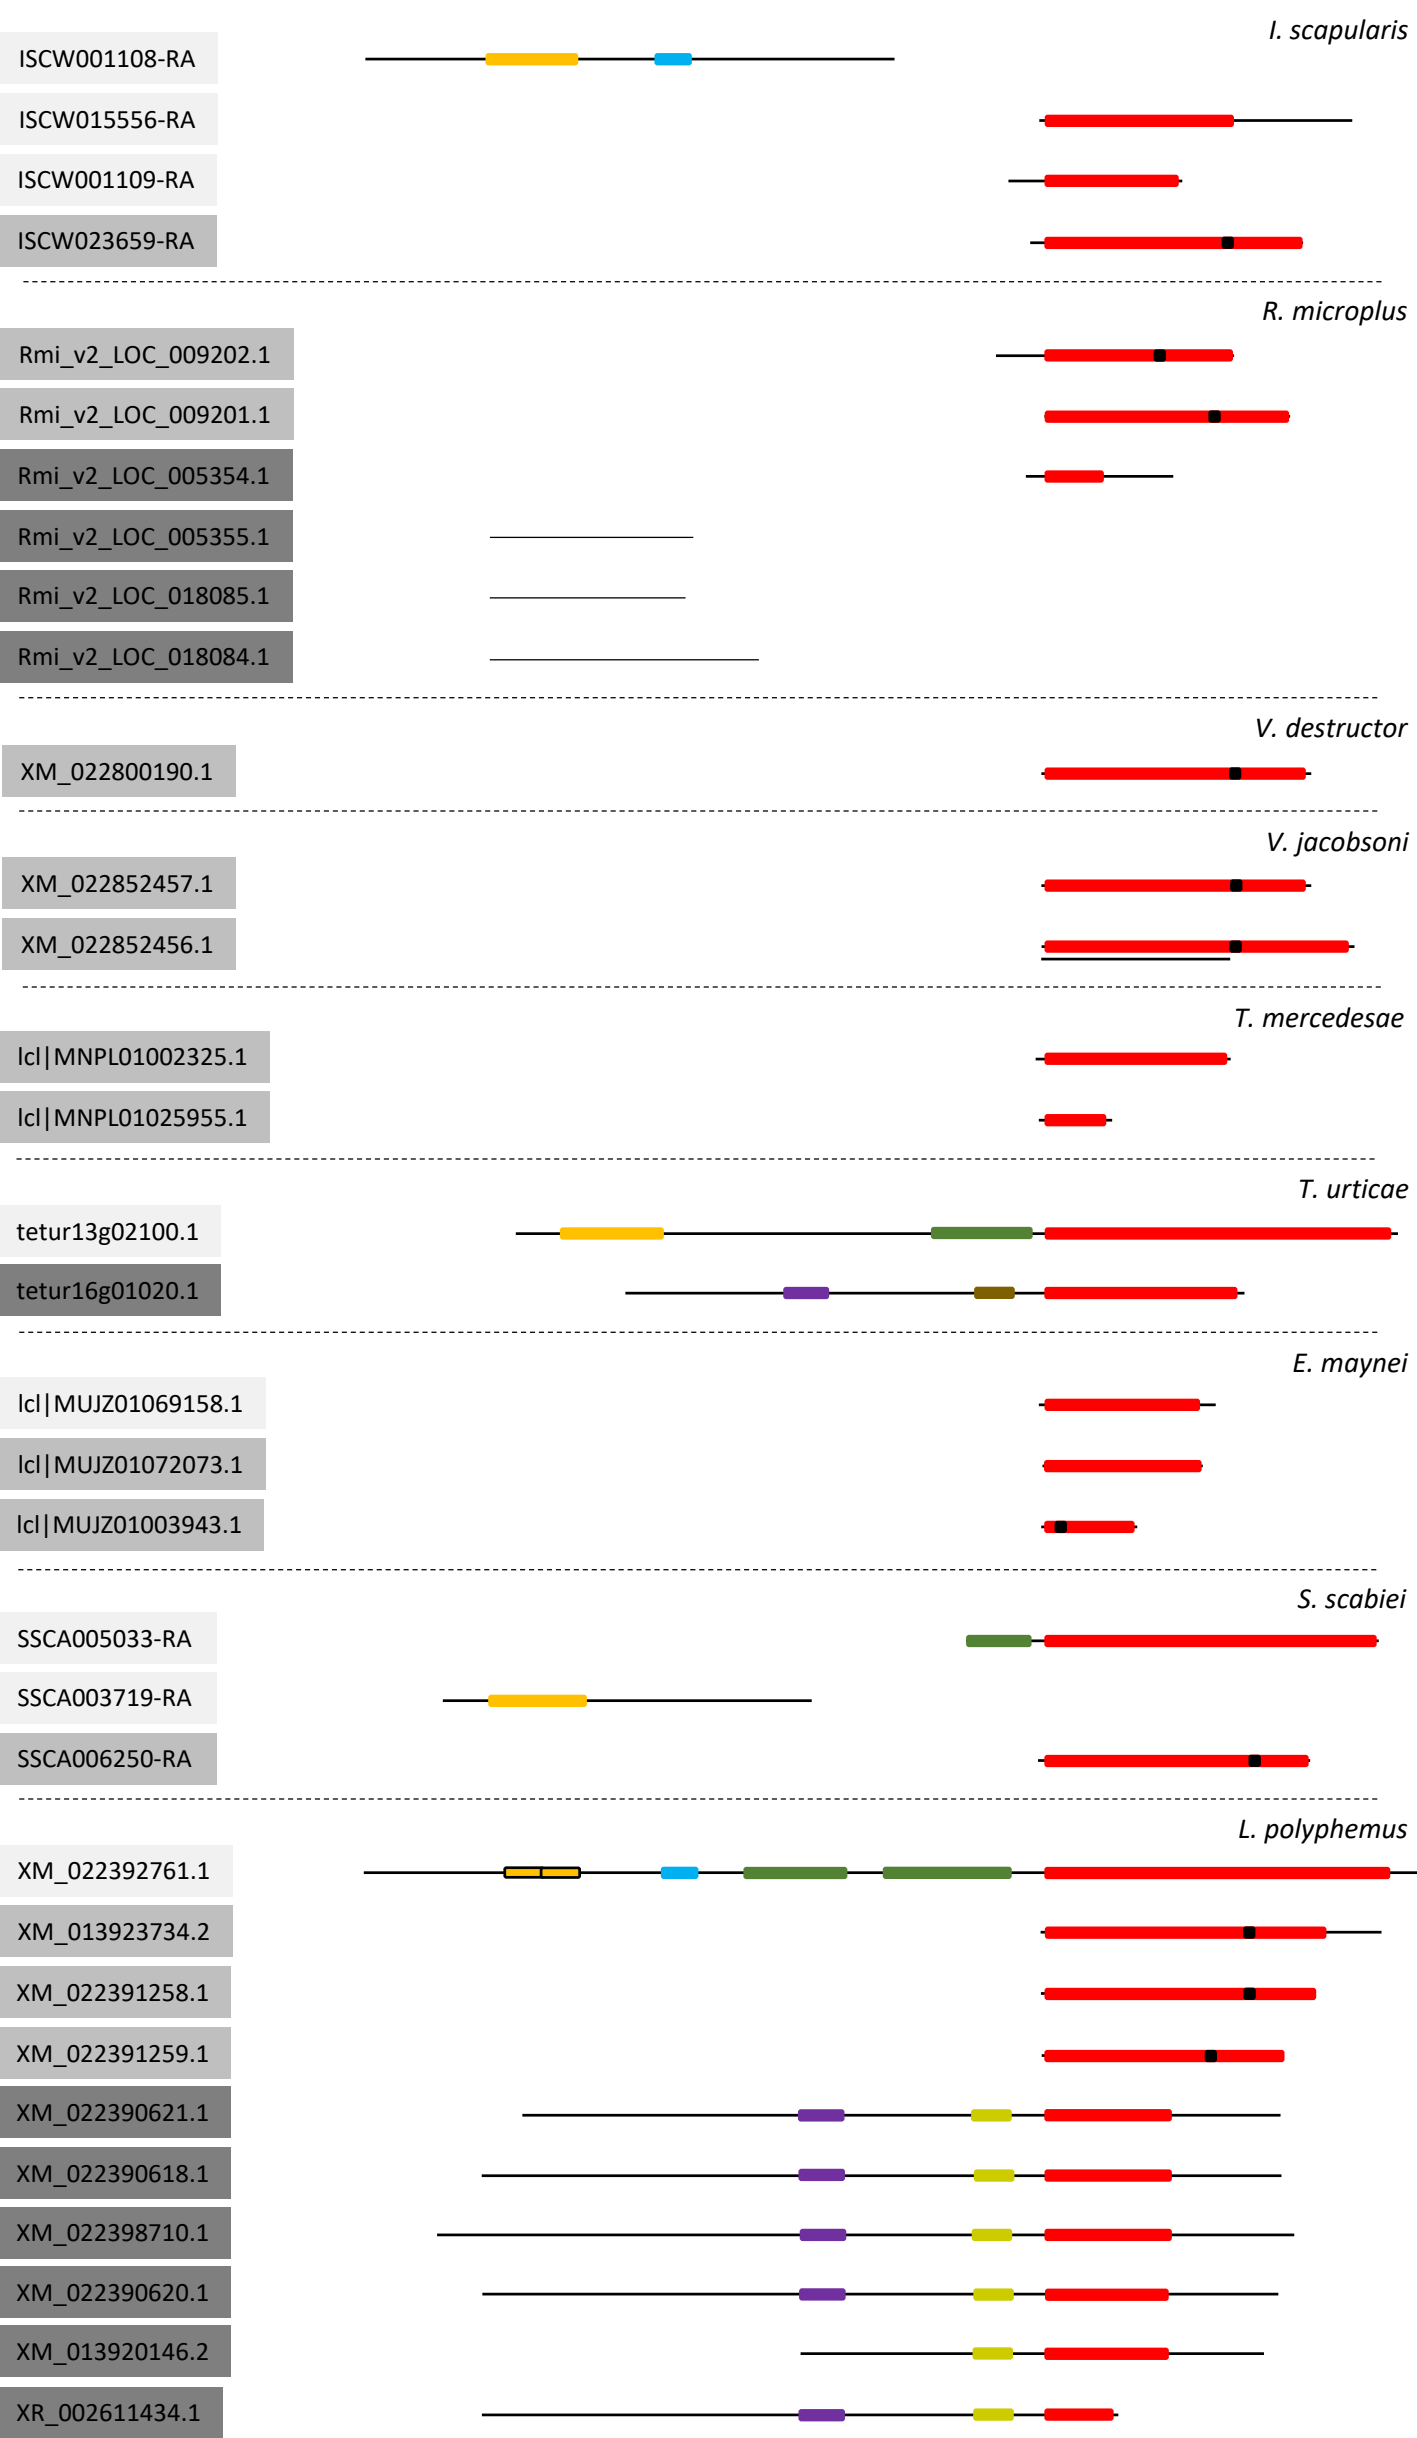

DinoT\_V2\_08956

DinoT\_V2\_05253

DinoT\_V2\_15614

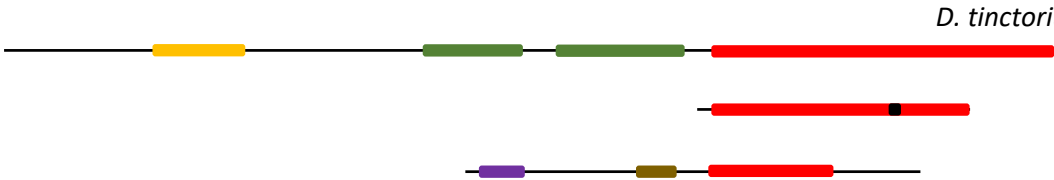

*D. tinctorium*

L\_delienseV2\_01337

L\_delienseV2\_11474

L\_delienseV2\_07634

L\_delienseV2\_11491

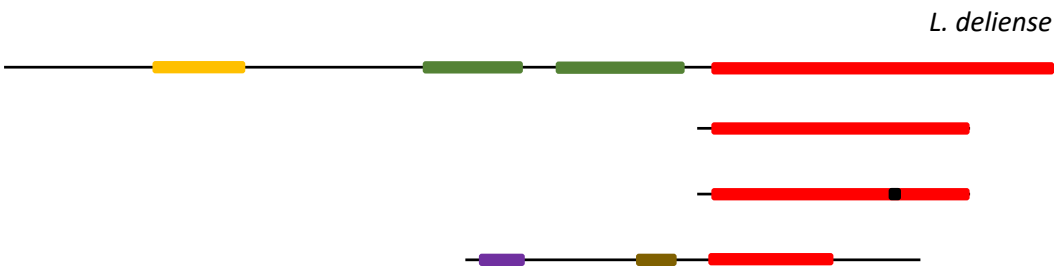

*L. deliense*
