# Supplementary material for: DNA Methylation Patterns in the Social Spider, Stegodyphus dumicola
Source: MDPI journal article supplement (doi:10.3390/genes10020137), 2019-02-12

## Figure S6

Distribution of Stringtie-predicted exons that were also predicted by AUGUSTUS. The x-axis indicates the percentage of a Stringtie-predicted exon being predicted by AUGUSTUS.

## RNA-seq exons recovered by Augustus

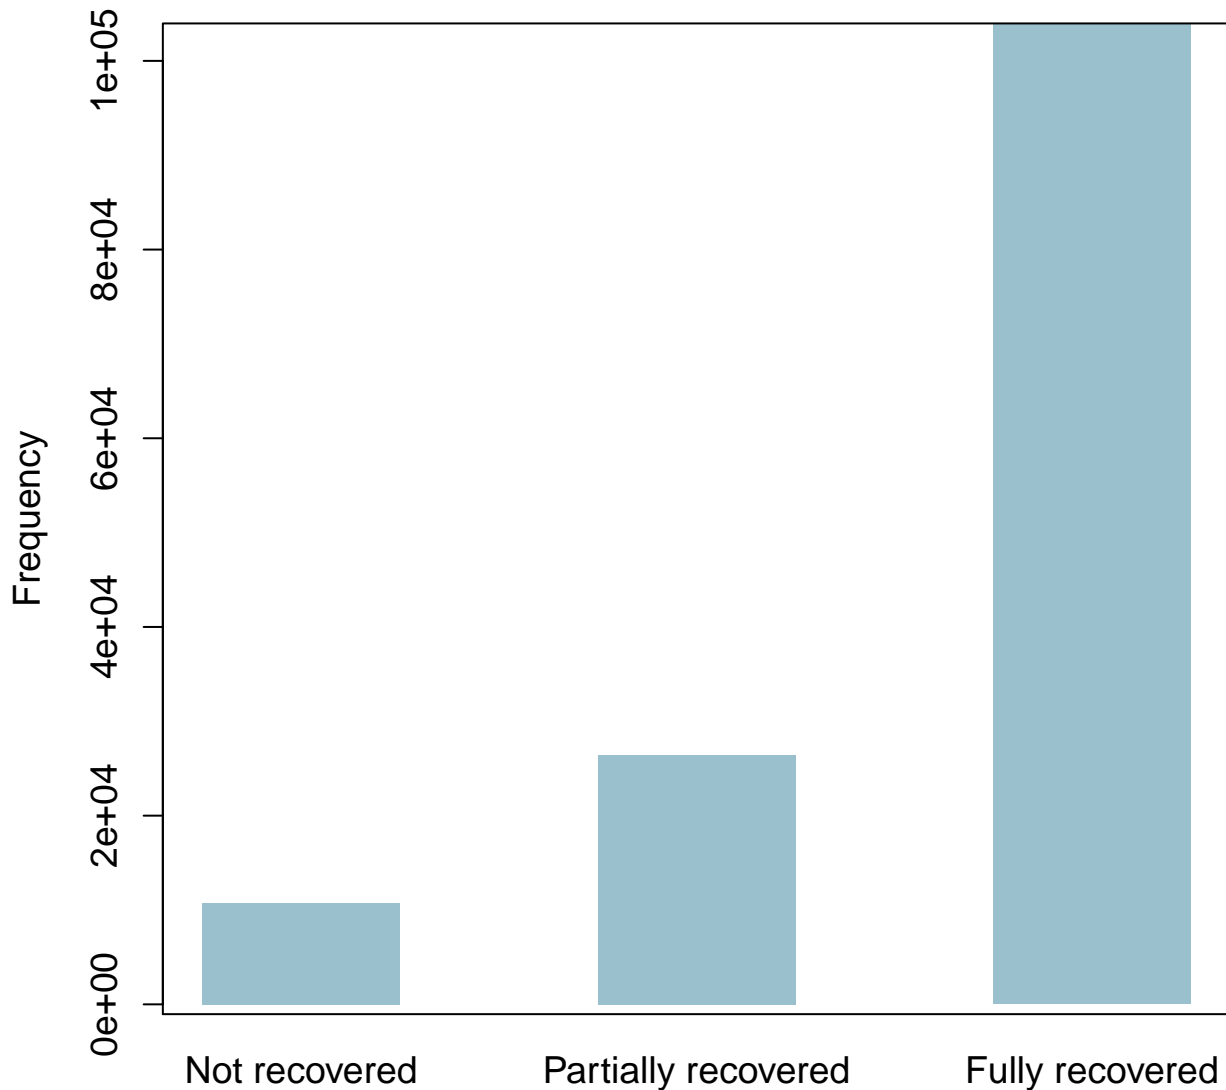

Supplement: s2 [file s2]
