# Supplementary material for: DNA Methylation Patterns in the Social Spider, Stegodyphus dumicola
Source: MDPI journal article supplement (doi:10.3390/genes10020137), 2019-02-12

Figure S10

Correlation of evolutionary rates (dS, dN and dN/dS) and CpG<sub>O/E</sub> of protein coding genes found to be orthologs in *S. duminicola* and *S. mimosarum* using a best reciprocal blast approach.

**CpG O/E vs dN/dS of ortholog genes**

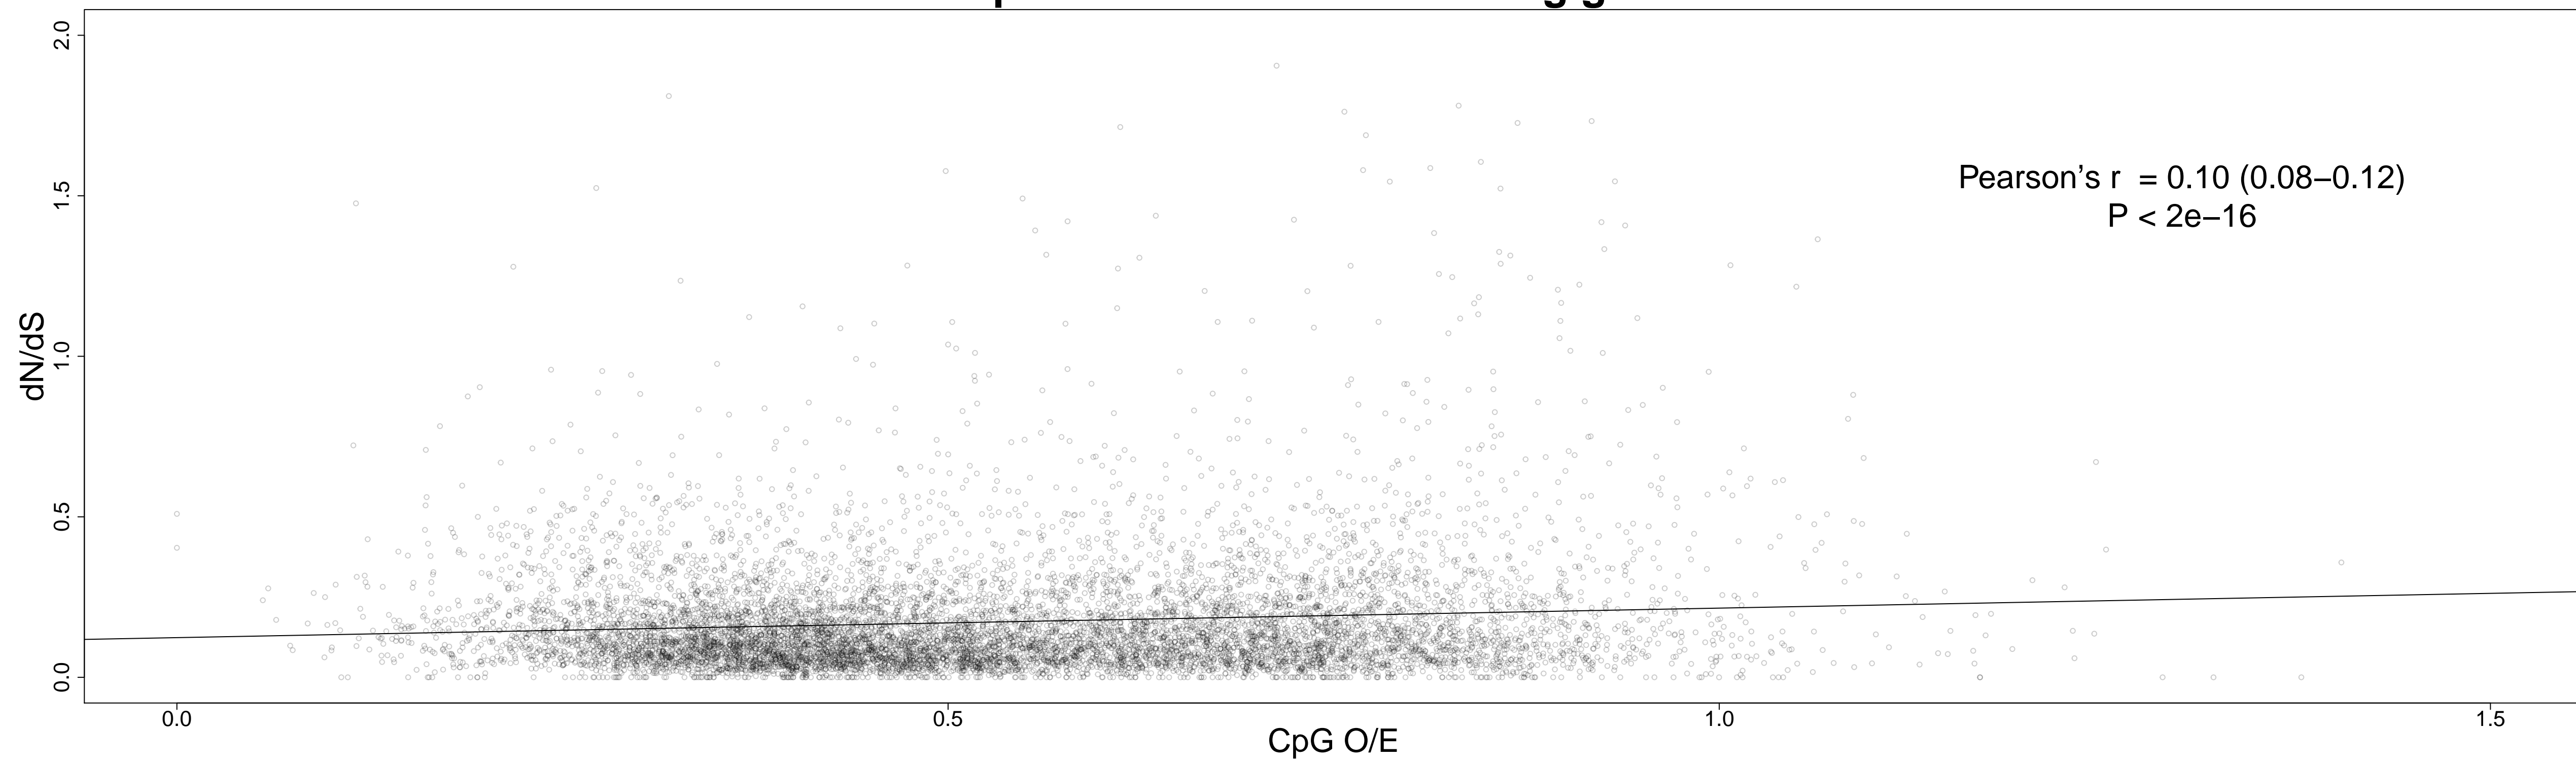

**CpG O/E vs dN of ortholog genes**

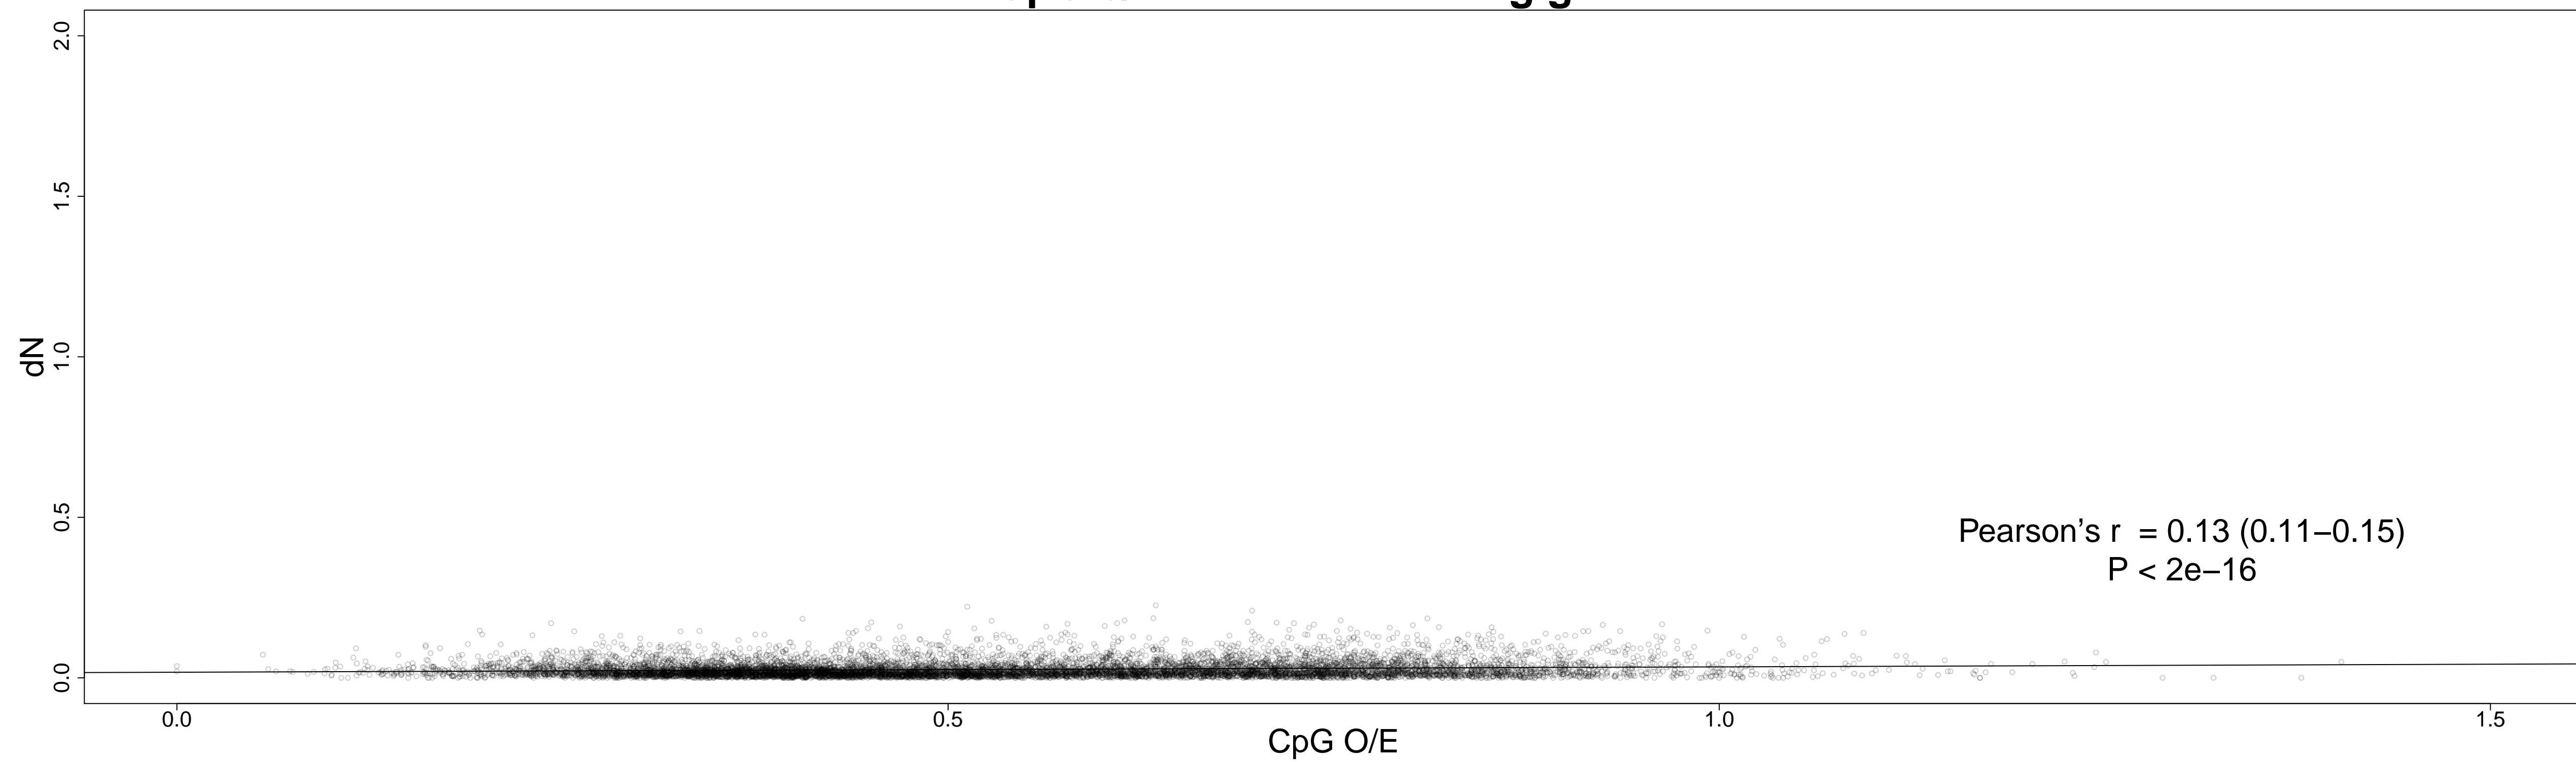

**CpG O/E vs dS of ortholog genes**

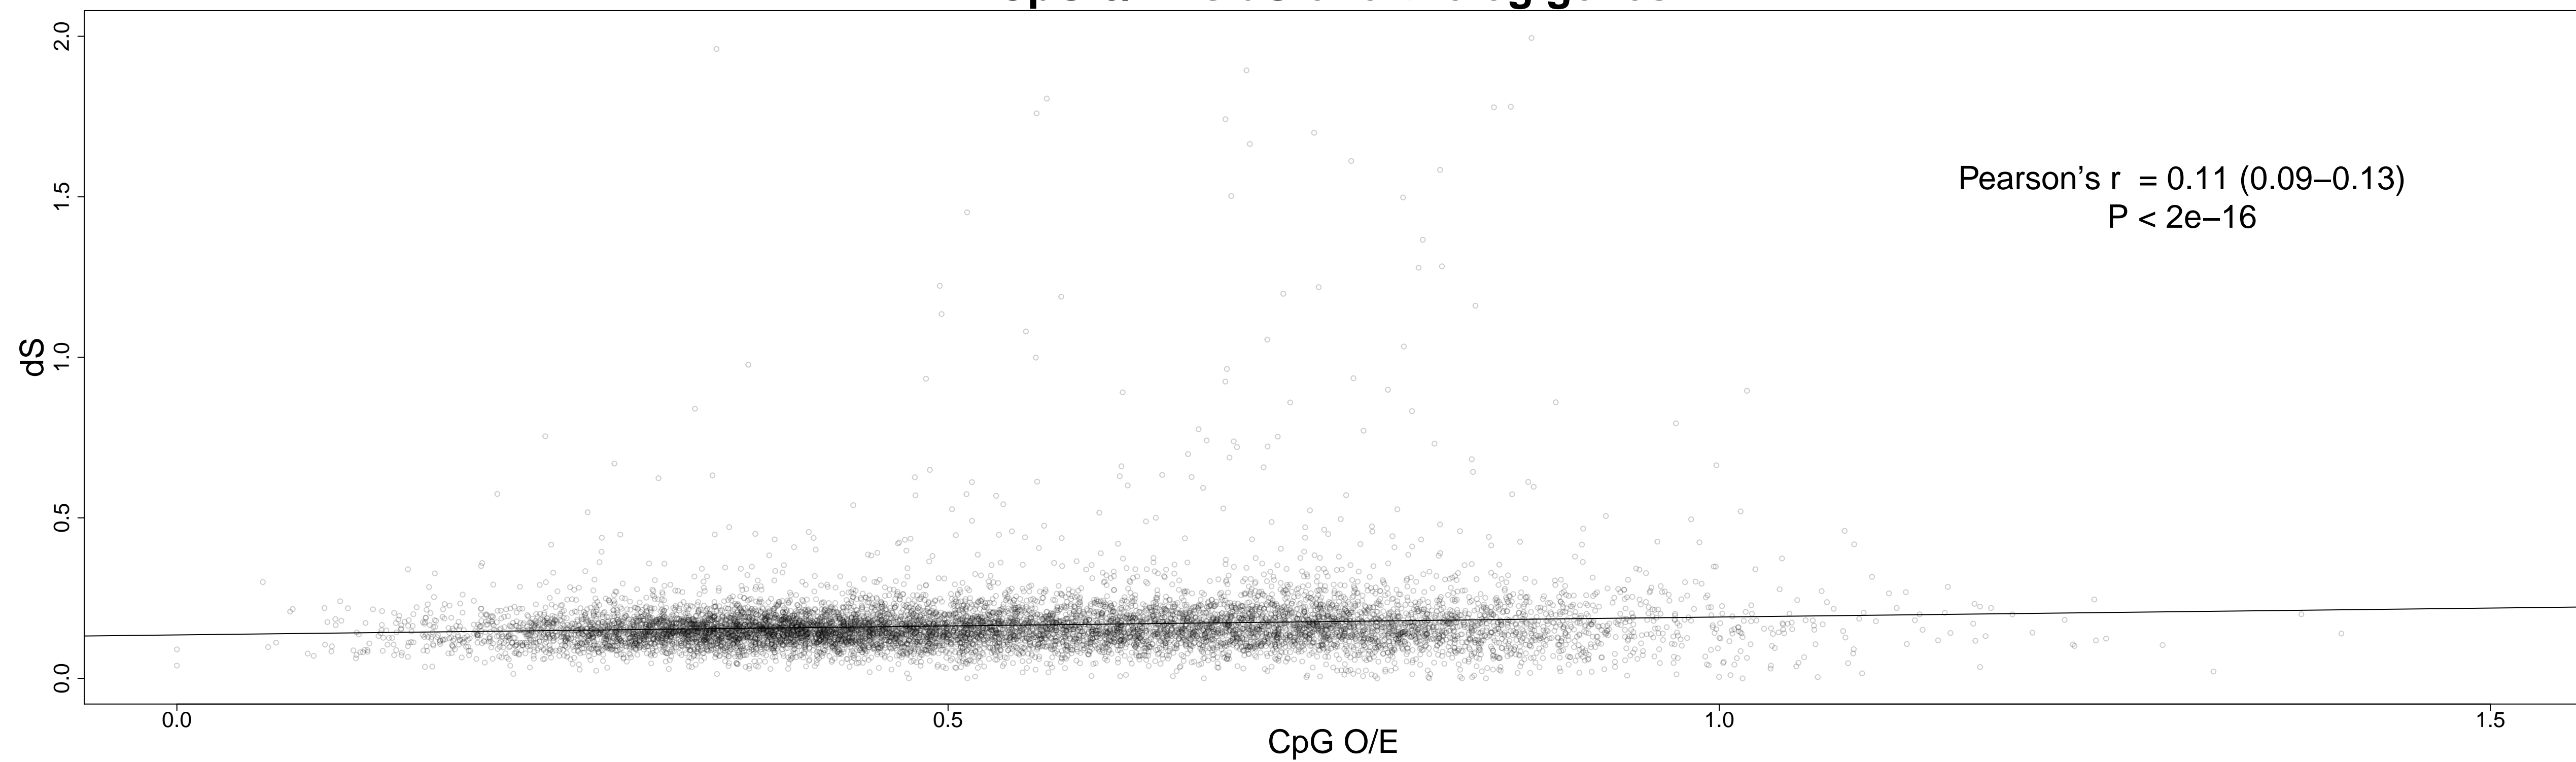

Supplement: s2 [file s2]
