# Supplementary material for: DNA Methylation Patterns in the Social Spider, Stegodyphus dumicola
Source: MDPI journal article supplement (doi:10.3390/genes10020137), 2019-02-12

## Figure S5

Depth distribution and insert size distribution of the Illumina reads (WG-I) upon mapping back to the reference genome.

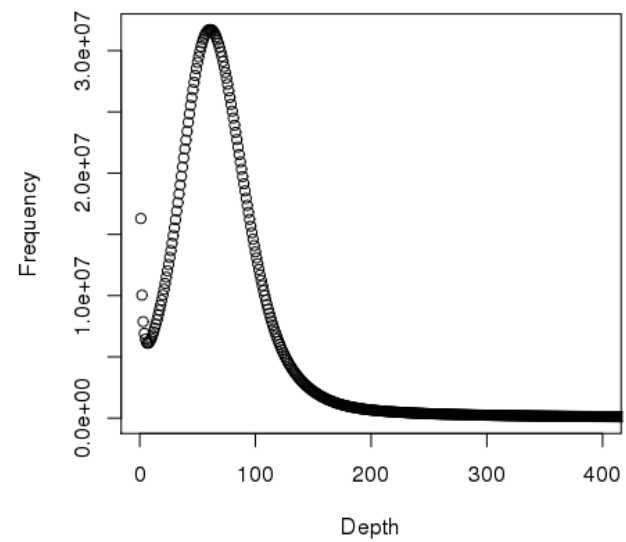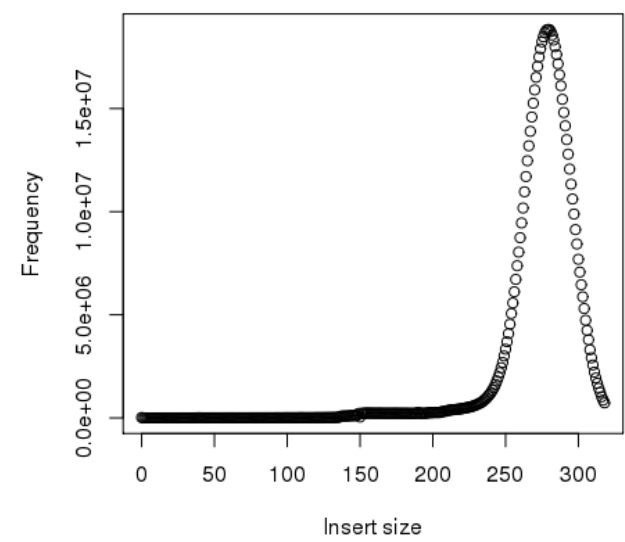

Supplement: s2 [file s2]
