# Supplementary material for: DNA Methylation Patterns in the Social Spider, Stegodyphus dumicola
Source: MDPI journal article supplement (doi:10.3390/genes10020137), 2019-02-12
Supplement: s2 [file s2]

### Figure S13

Distributions of CpG<sub>O/E</sub> and GpC<sub>O/E</sub> estimated for protein coding genes and entire genomes for all studied chelicerate genome sequences.

**CpG O/E**

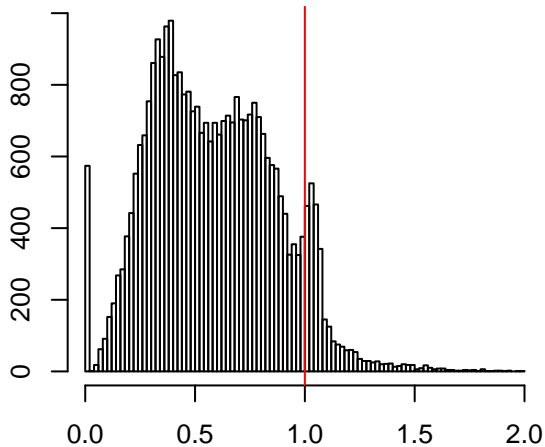

*Stegodyphus mimosarum* – genes

**CpG O/E**

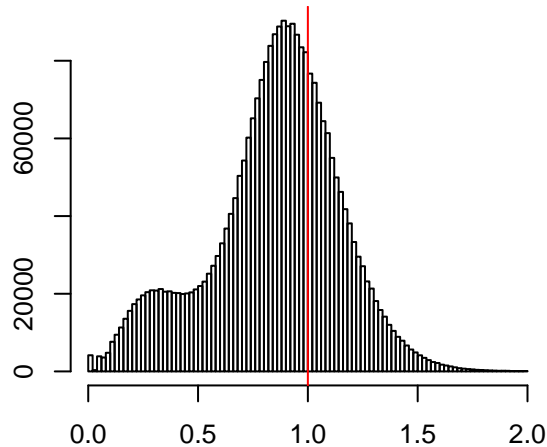

*Stegodyphus mimosarum* – genome

**GpC O/E**

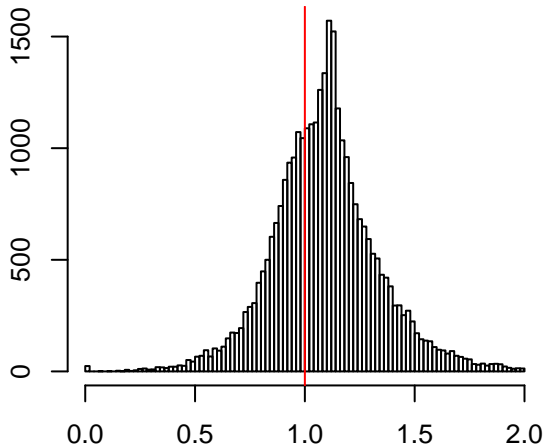

*Stegodyphus mimosarum* – genes

**GpC O/E**

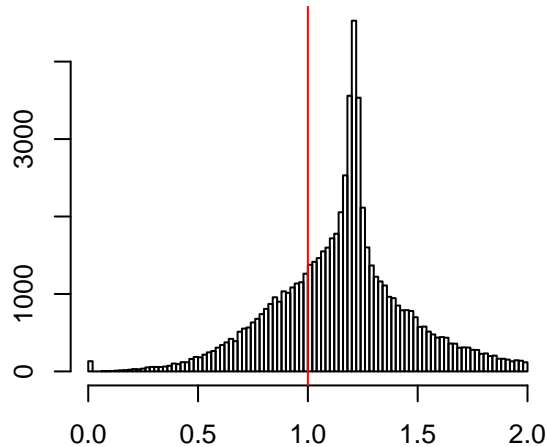

*Stegodyphus mimosarum* – genome

**CpG O/E**

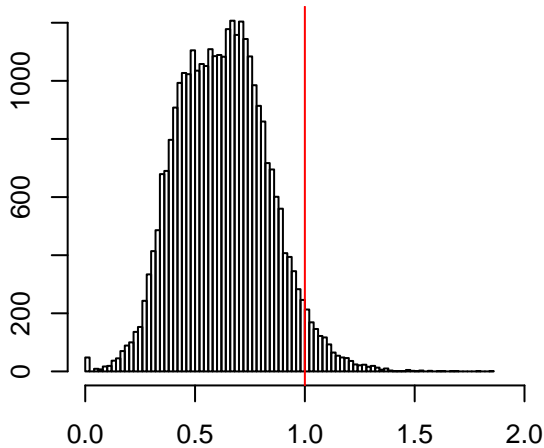

*Parasteatoda tepidariorum* – genes

**CpG O/E**

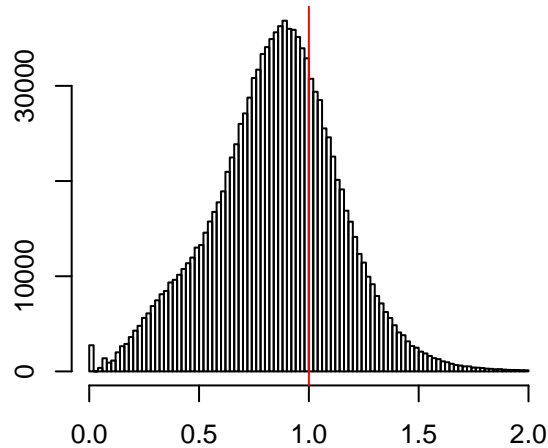

*Parasteatoda tepidariorum* – genome

**GpC O/E**

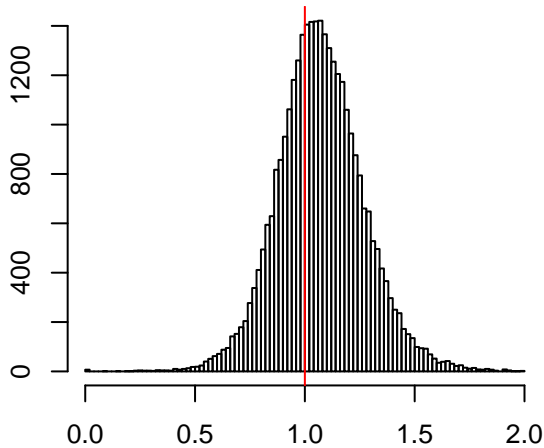

*Parasteatoda tepidariorum* – genes

**GpC O/E**

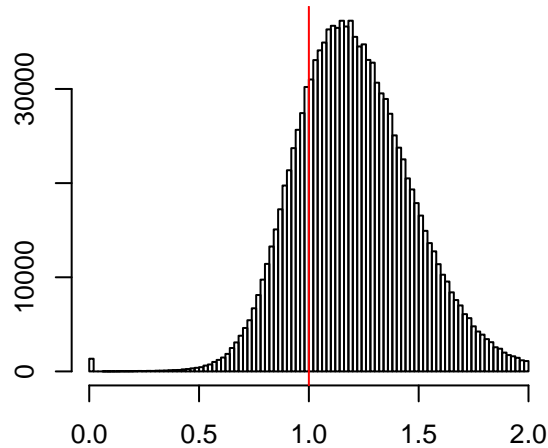

*Parasteatoda tepidariorum* – genome

**CpG O/E**

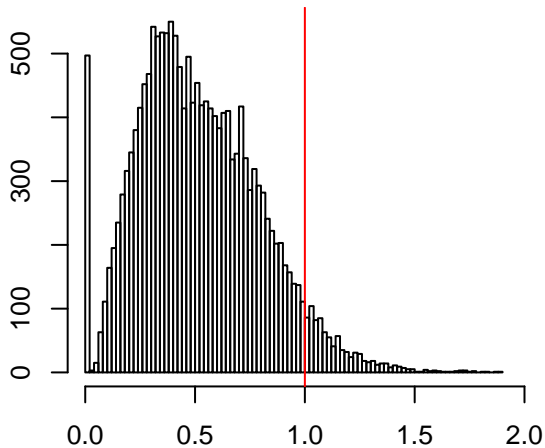

*Latrodectus hesperus* – genes

**CpG O/E**

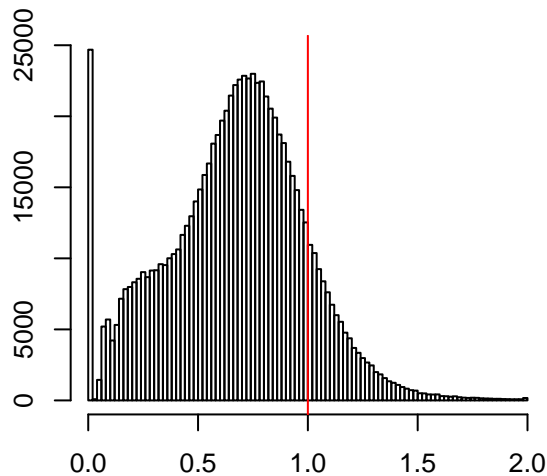

*Latrodectus hesperus* – genome

**GpC O/E**

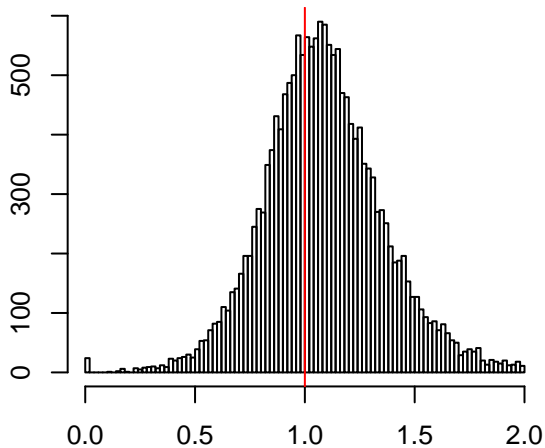

*Latrodectus hesperus* – genes

**GpC O/E**

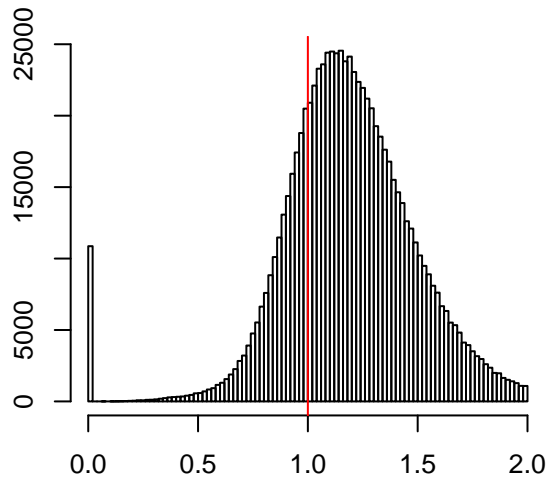

*Latrodectus hesperus* – genome

**CpG O/E**

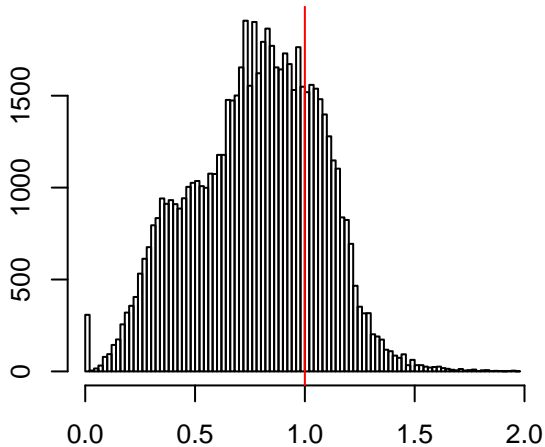

*Nephtila clavipes* – genes

**CpG O/E**

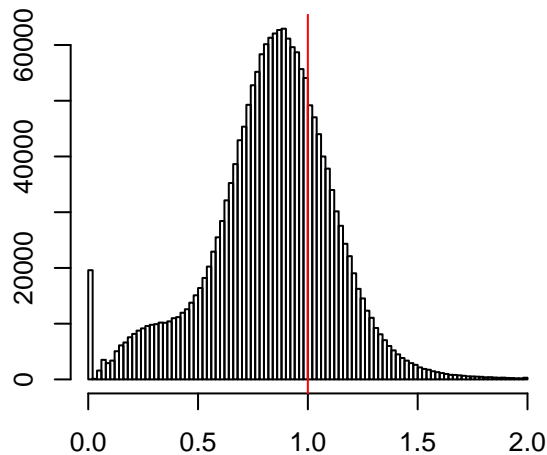

*Nephtila clavipes* – genome

**GpC O/E**

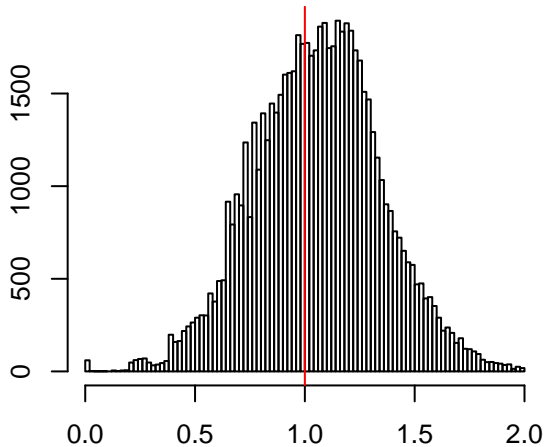

*Nephtila clavipes* – genes

**GpC O/E**

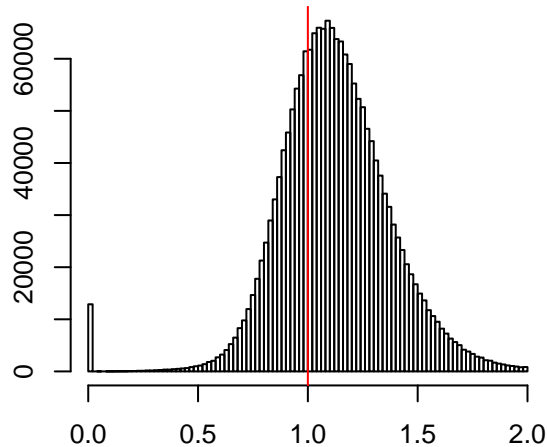

*Nephtila clavipes* – genome

**CpG O/E**

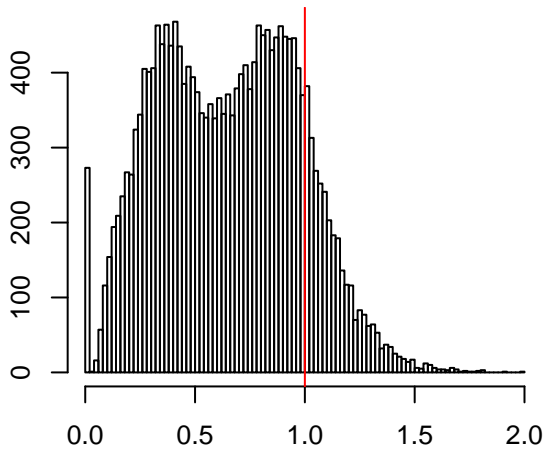

*Loxosceles reclusa* – genes

**CpG O/E**

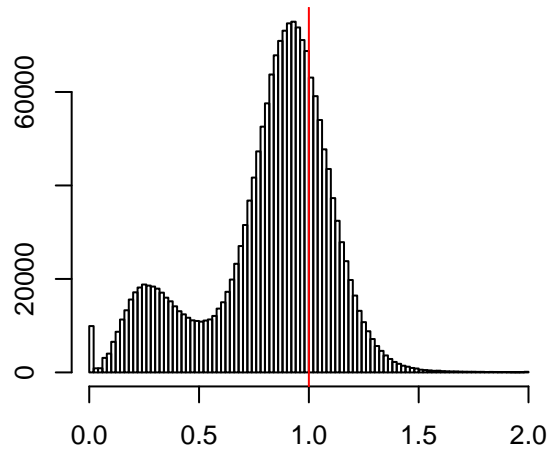

*Loxosceles reclusa* – genome

**GpC O/E**

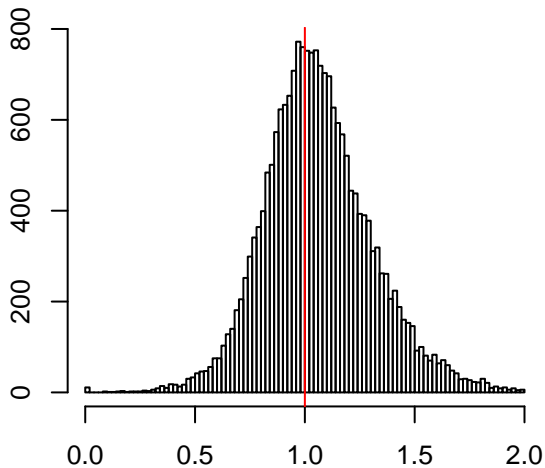

*Loxosceles reclusa* – genes

**GpC O/E**

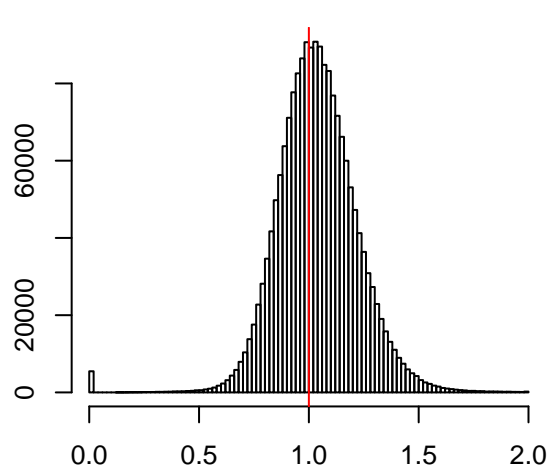

*Loxosceles reclusa* – genome

**CpG O/E**

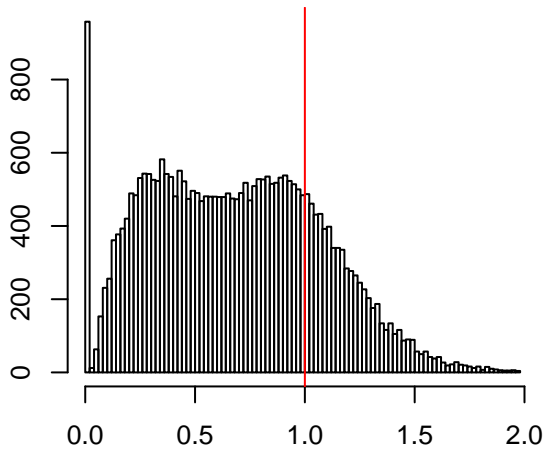

*Centruroides sculpturatus* – genes

**CpG O/E**

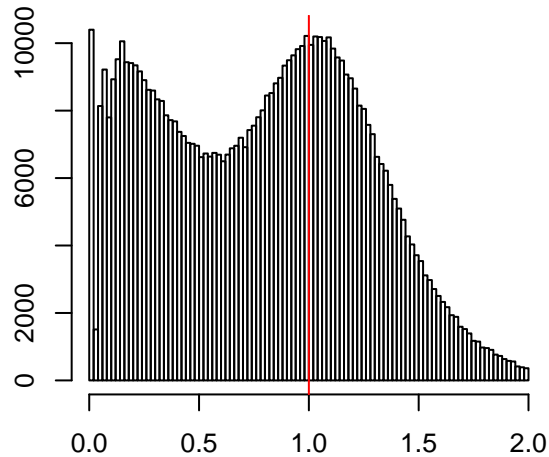

*Centruroides sculpturatus* – genome

**GpC O/E**

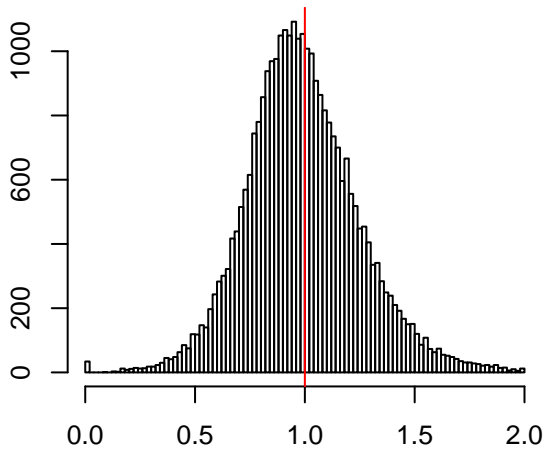

*Centruroides sculpturatus* – genes

**GpC O/E**

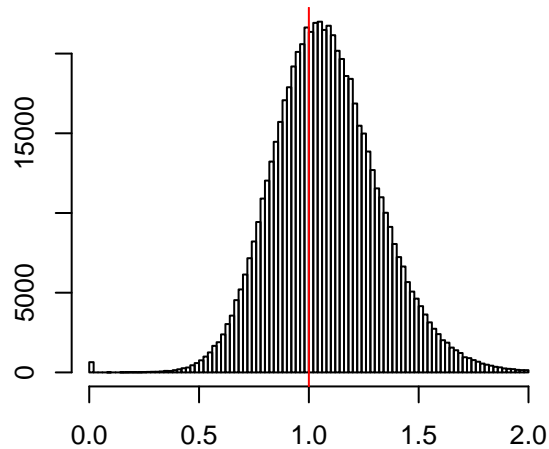

*Centruroides sculpturatus* – genome

### CpG O/E

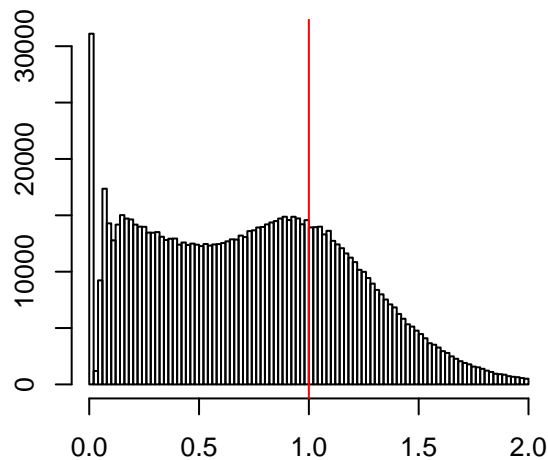

Mesobuthus martensii – genome

### GpC O/E

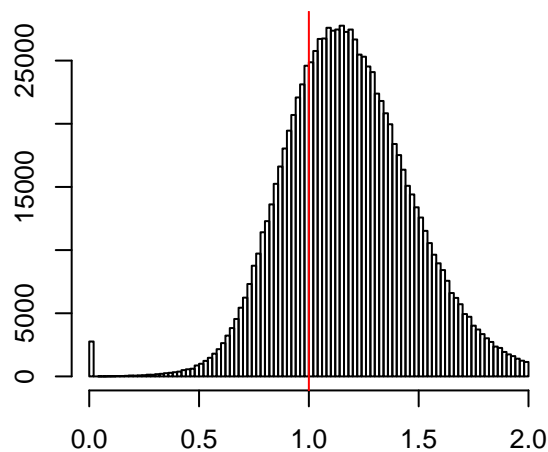

Mesobuthus martensii – genome



### CpG O/E

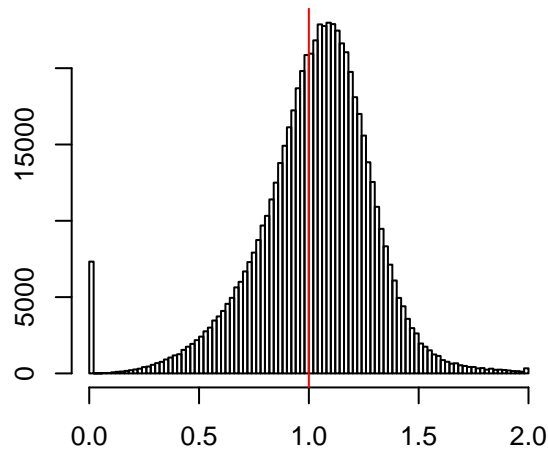

*Ixodes ricinus* – genome

### GpC O/E

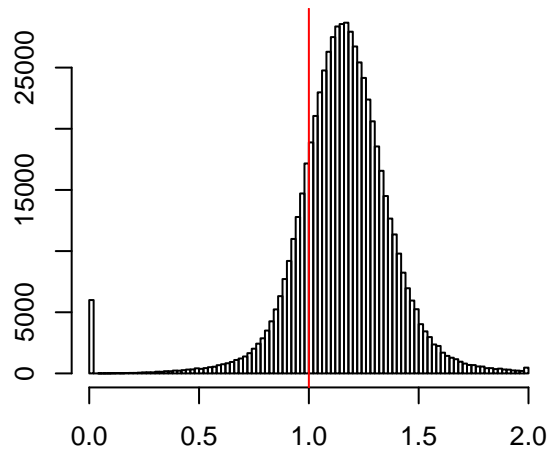

*Ixodes ricinus* – genome

**CpG O/E**

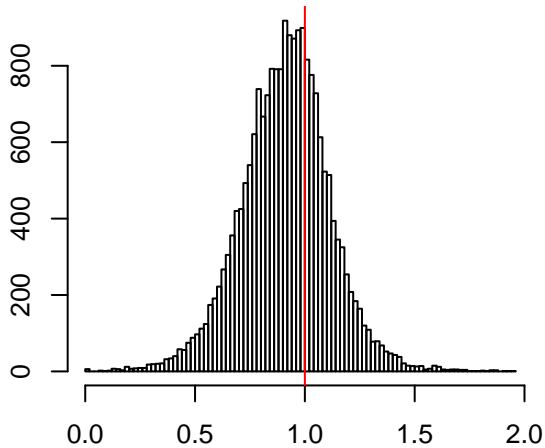

*Ixodes scapularis* – genes

**CpG O/E**

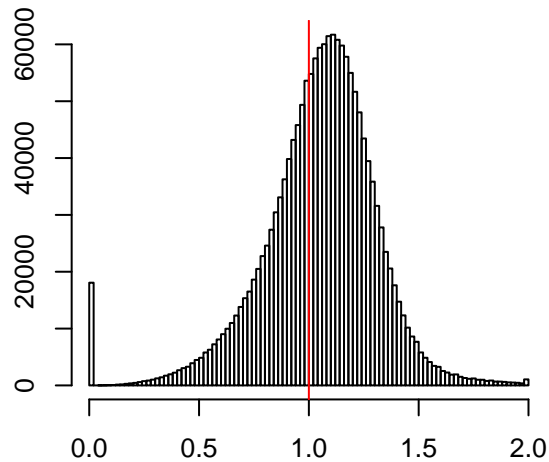

*Ixodes scapularis* – genome

**GpC O/E**

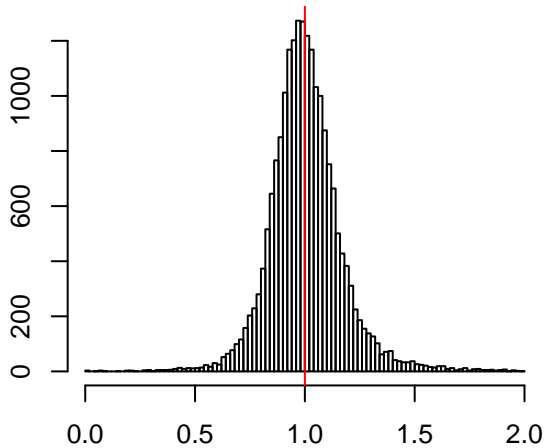

*Ixodes scapularis* – genes

**GpC O/E**

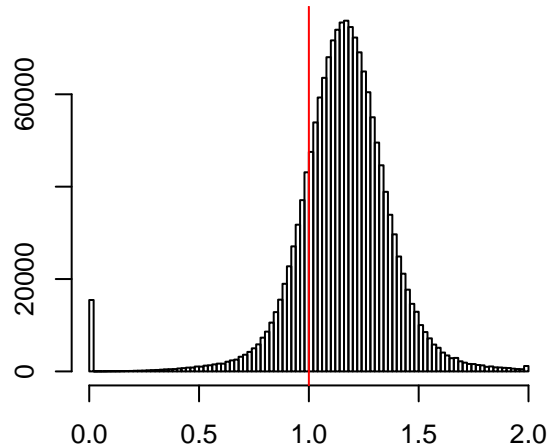

*Ixodes scapularis* – genome

**CpG O/E**

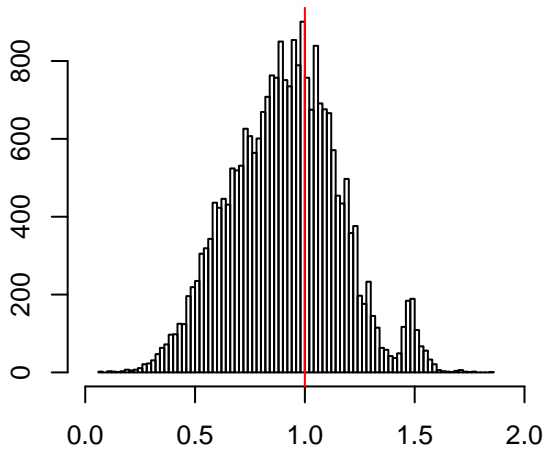

Rhipicephalus microplus – genes

**CpG O/E**

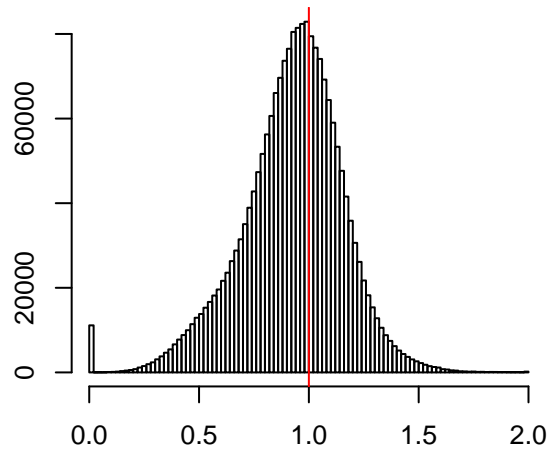

Rhipicephalus microplus – genome

**GpC O/E**

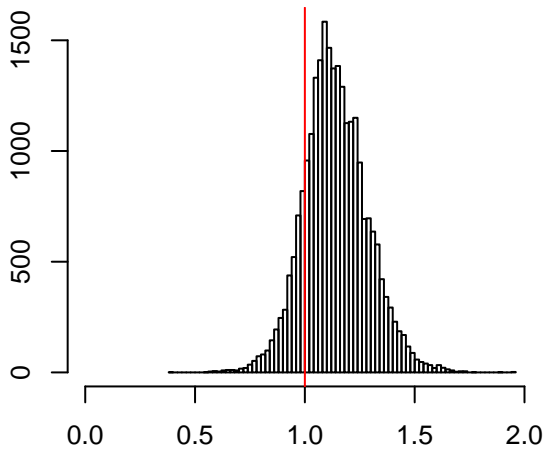

Rhipicephalus microplus – genes

**GpC O/E**

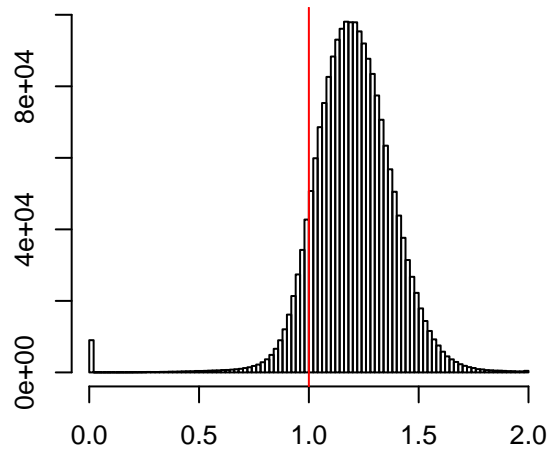

Rhipicephalus microplus – genome

### CpG O/E

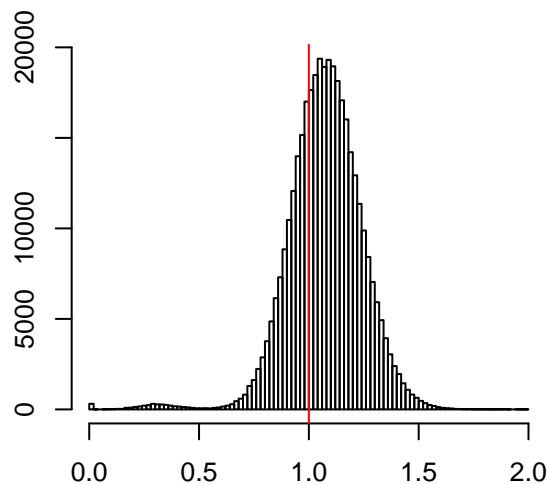

Varroa destructor – genome

### GpC O/E

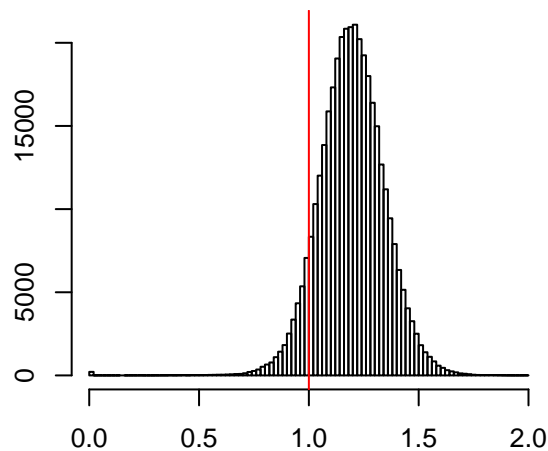

Varroa destructor – genome

### CpG O/E

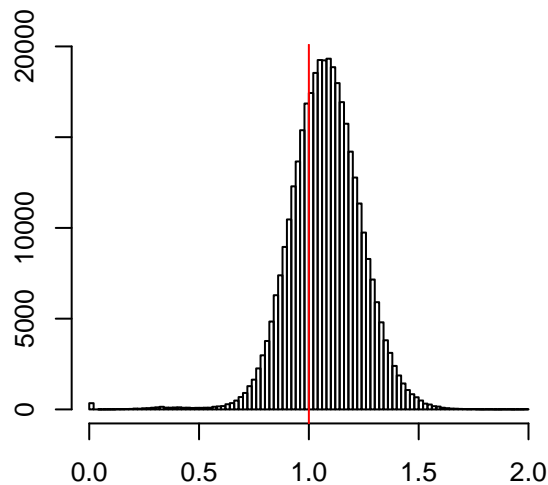

Varroa jacobsoni – genome

### GpC O/E

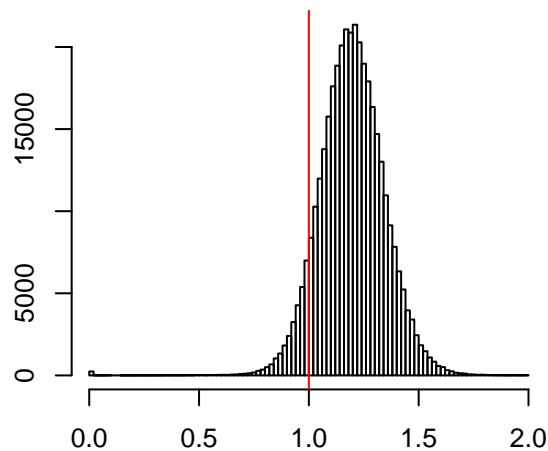

Varroa jacobsoni – genome

**CpG O/E**

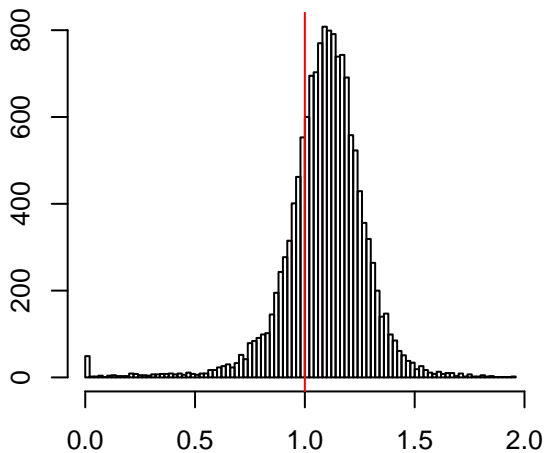

*Tropilaelaps mercedecae* – genes

**CpG O/E**

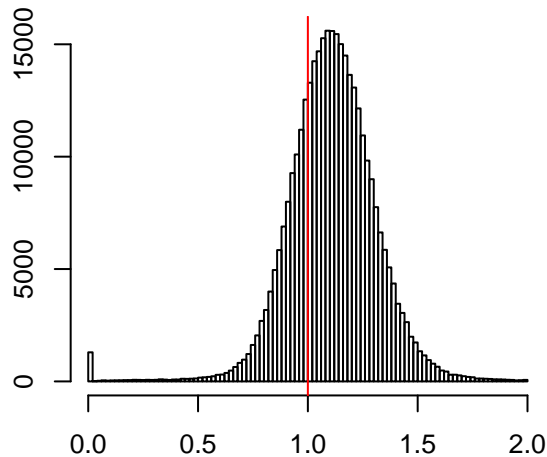

*Tropilaelaps mercedecae* – genome

**GpC O/E**

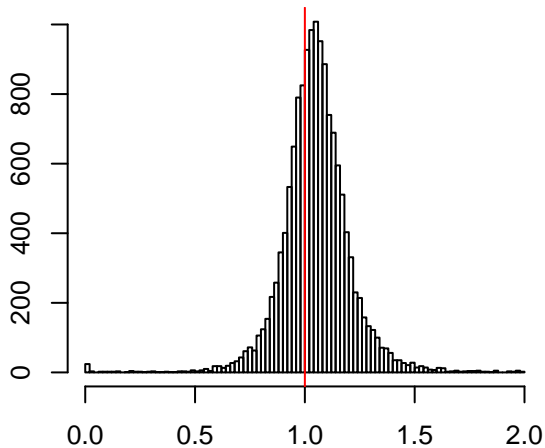

*Tropilaelaps mercedecae* – genes

**GpC O/E**

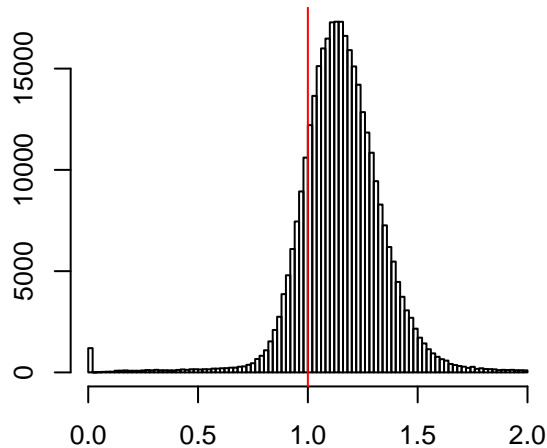

*Tropilaelaps mercedecae* – genome

**CpG O/E**

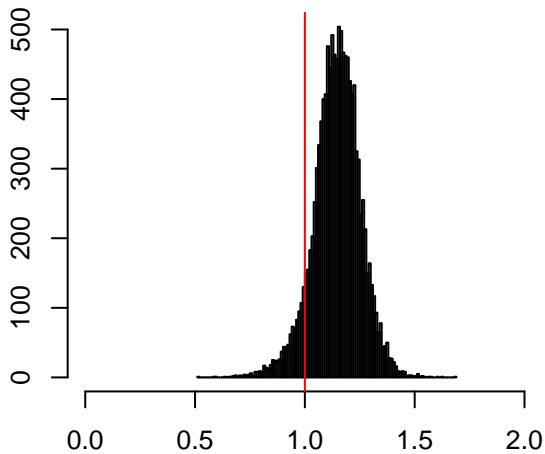

*Metaseiulus occidentalis* – genes

**CpG O/E**

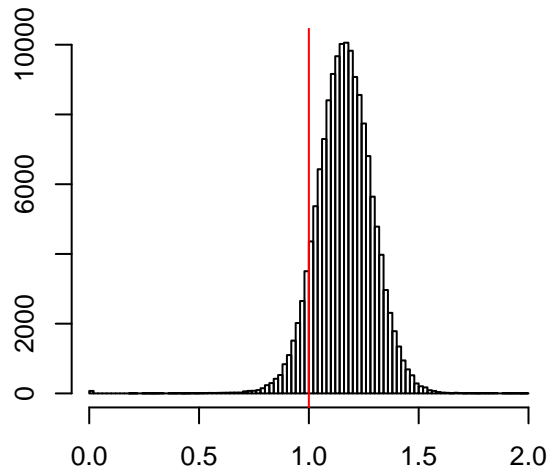

*Metaseiulus occidentalis* – genome

**GpC O/E**

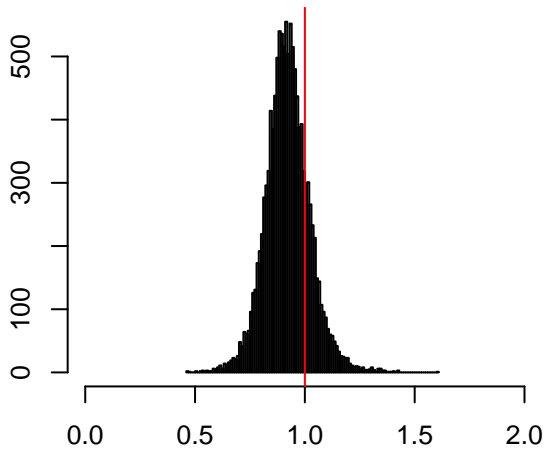

*Metaseiulus occidentalis* – genes

**GpC O/E**

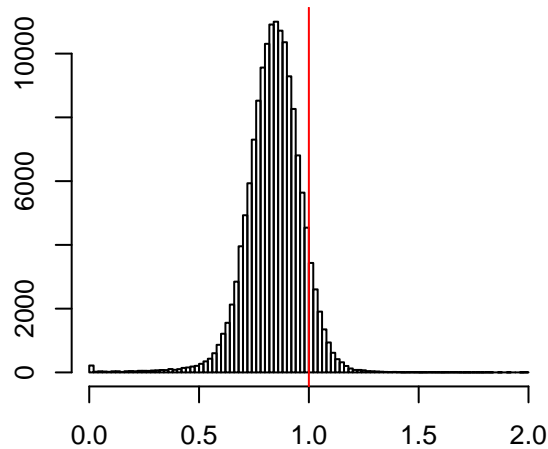

*Metaseiulus occidentalis* – genome

**CpG O/E**

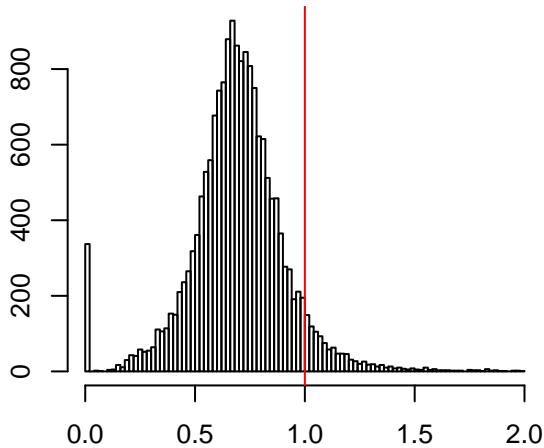

*Tetranychus urticae* – genes

**CpG O/E**

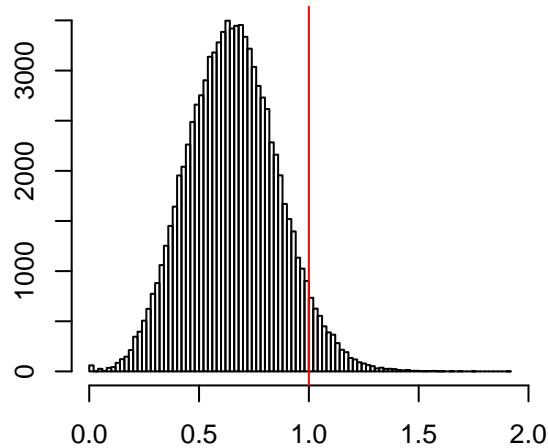

*Tetranychus urticae* – genome

**GpC O/E**

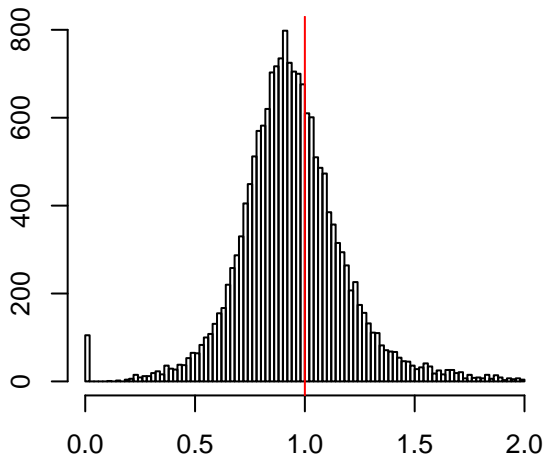

*Tetranychus urticae* – genes

**GpC O/E**

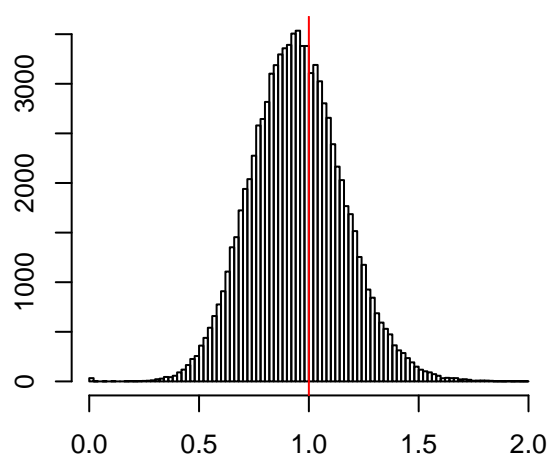

*Tetranychus urticae* – genome



### CpG O/E

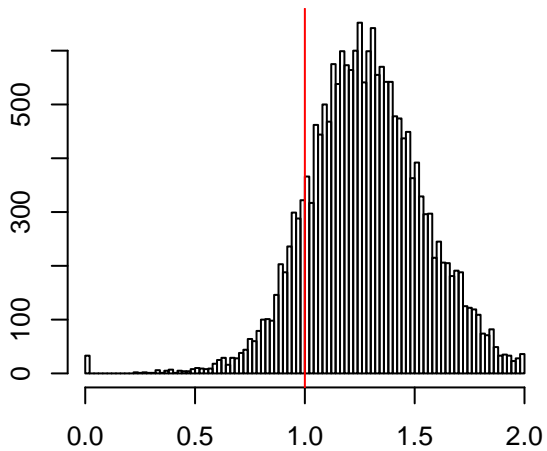

*Dinotrombium\_tinctorium* - genes

### GpC O/E

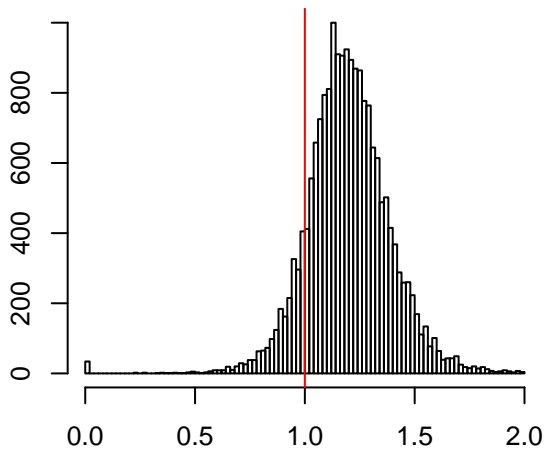

*Dinotrombium\_tinctorium* - genes

### CpG O/E

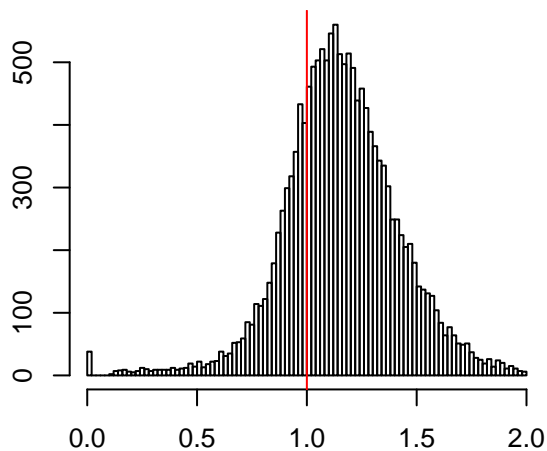

*Leptotrombidium deliense* – genes

### GpC O/E

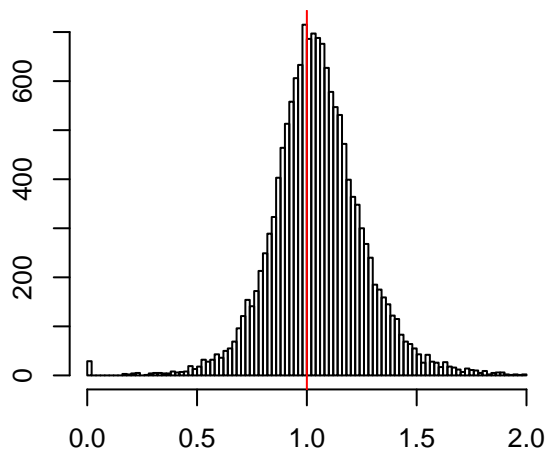

*Leptotrombidium deliense* – genes

### CpG O/E

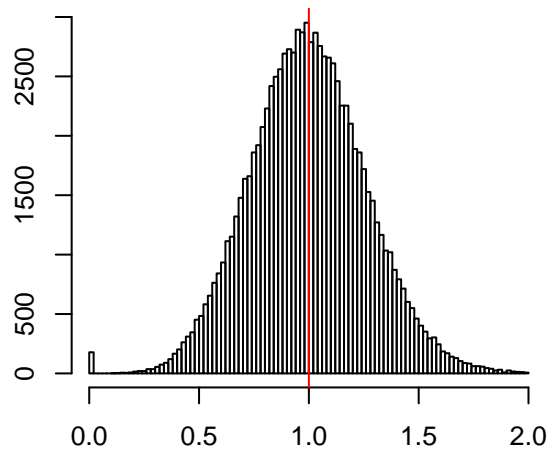

*Dermatophagoides farinae* – genome

### GpC O/E

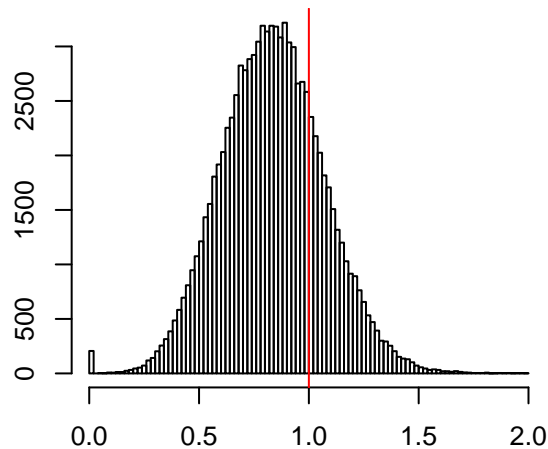

*Dermatophagoides farinae* – genome

### CpG O/E

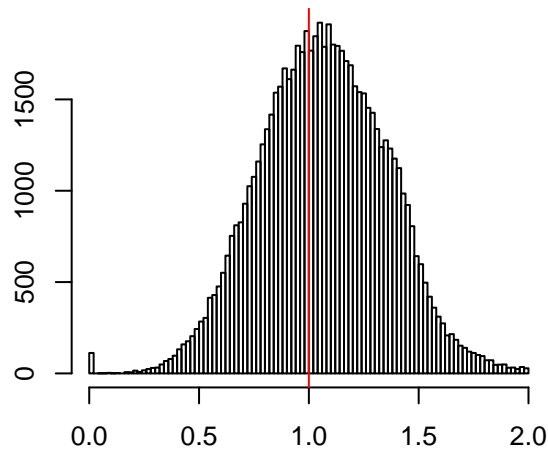

*Dermatophagoides pteronyssinus* – genome

### GpC O/E

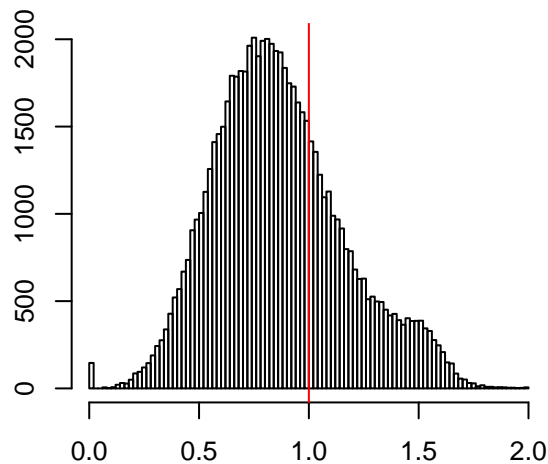

*Dermatophagoides pteronyssinus* – genome

**CpG O/E**

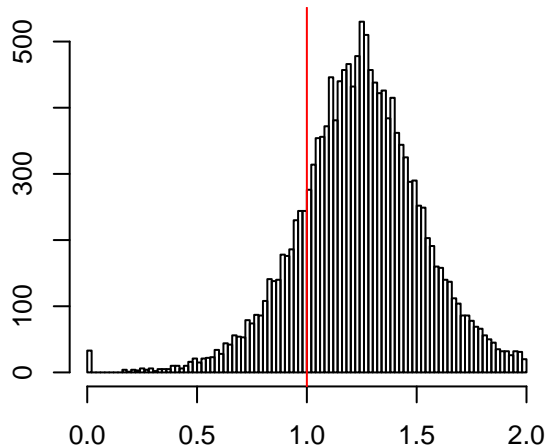

*Euroglyphus maynei* – genes

**CpG O/E**

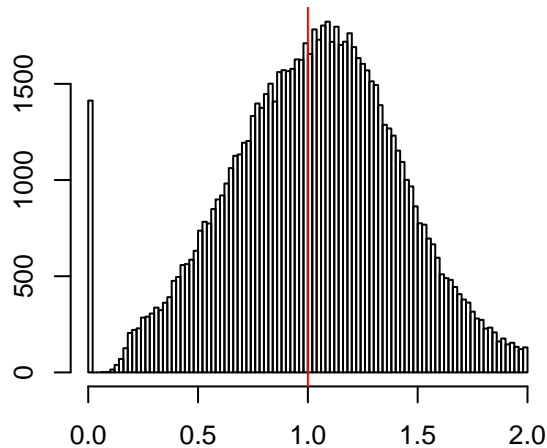

*Euroglyphus maynei* – genome

**GpC O/E**

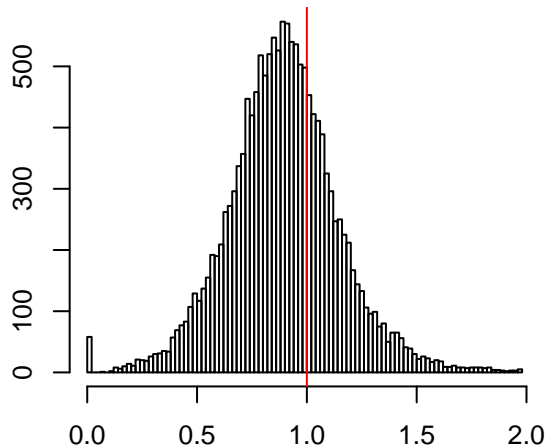

*Euroglyphus maynei* – genes

**GpC O/E**

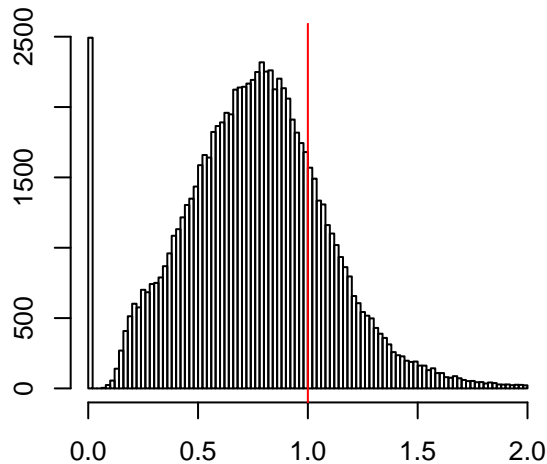

*Euroglyphus maynei* – genome

**CpG O/E**

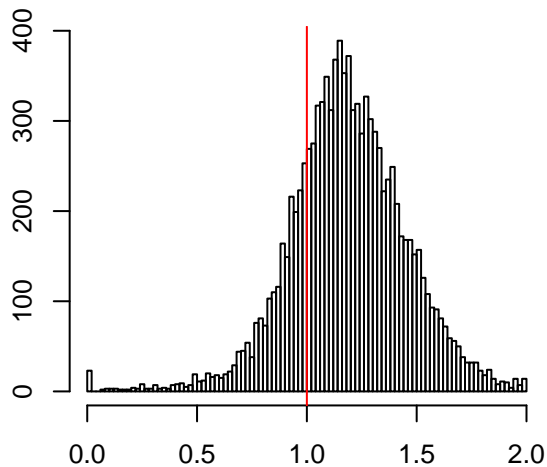

Sarcptes scabiei – genes

**CpG O/E**

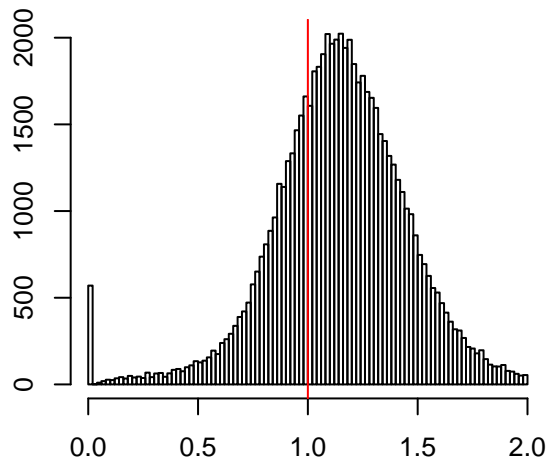

Sarcptes scabiei – genome

**GpC O/E**

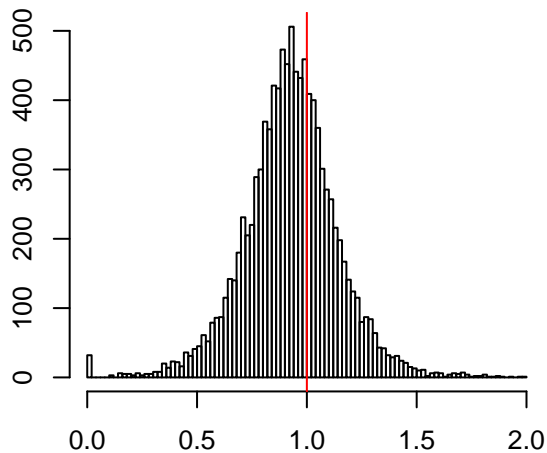

Sarcptes scabiei – genes

**GpC O/E**

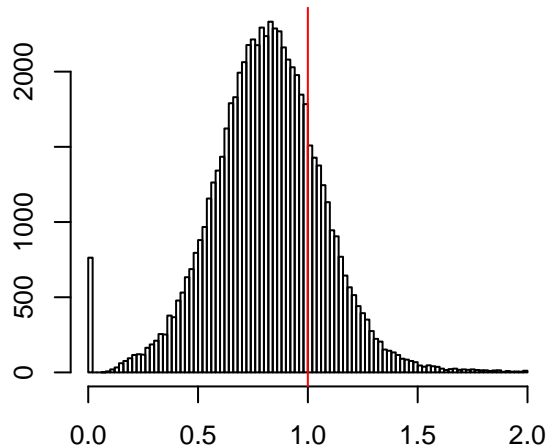

Sarcptes scabiei – genome

**CpG O/E**

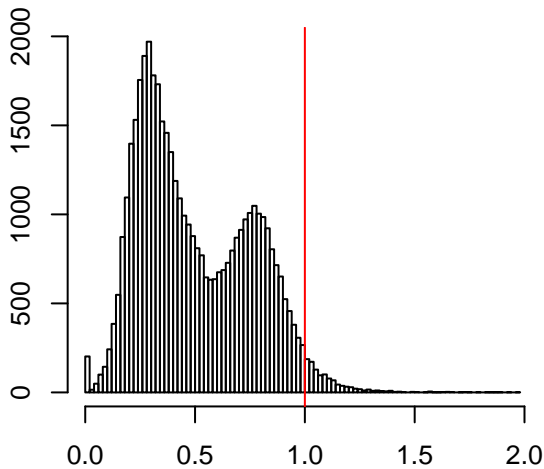

Limulus polyphemus – genes

**CpG O/E**

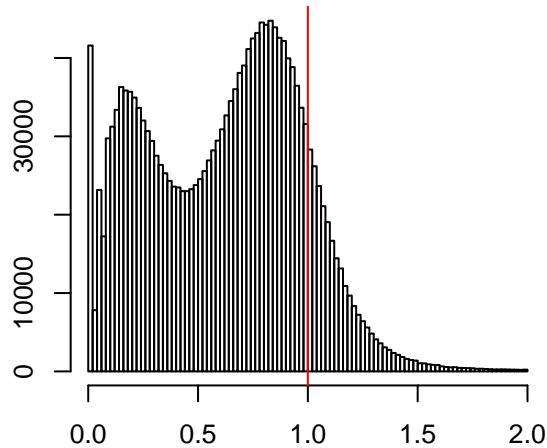

Limulus polyphemus – genome

**GpC O/E**

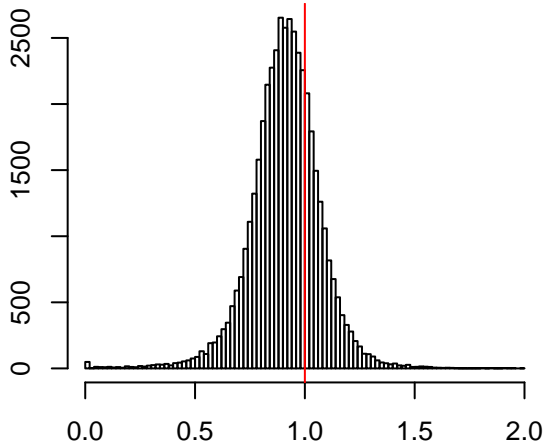

Limulus polyphemus – genes

**GpC O/E**

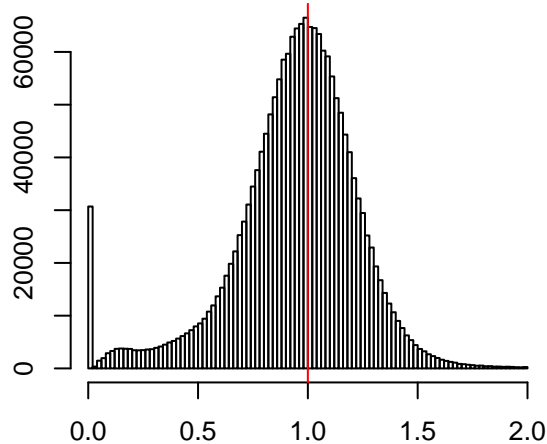

Limulus polyphemus – genome
