# Supplementary material for: DNA Methylation Patterns in the Social Spider, Stegodyphus dumicola
Source: MDPI journal article supplement (doi:10.3390/genes10020137), 2019-02-12

## Figure S1

Geographical locations of *Stegodyphus dumicola* populations sampled in this study. The Ndumo population is from South Africa and the remaining are from Namibia.

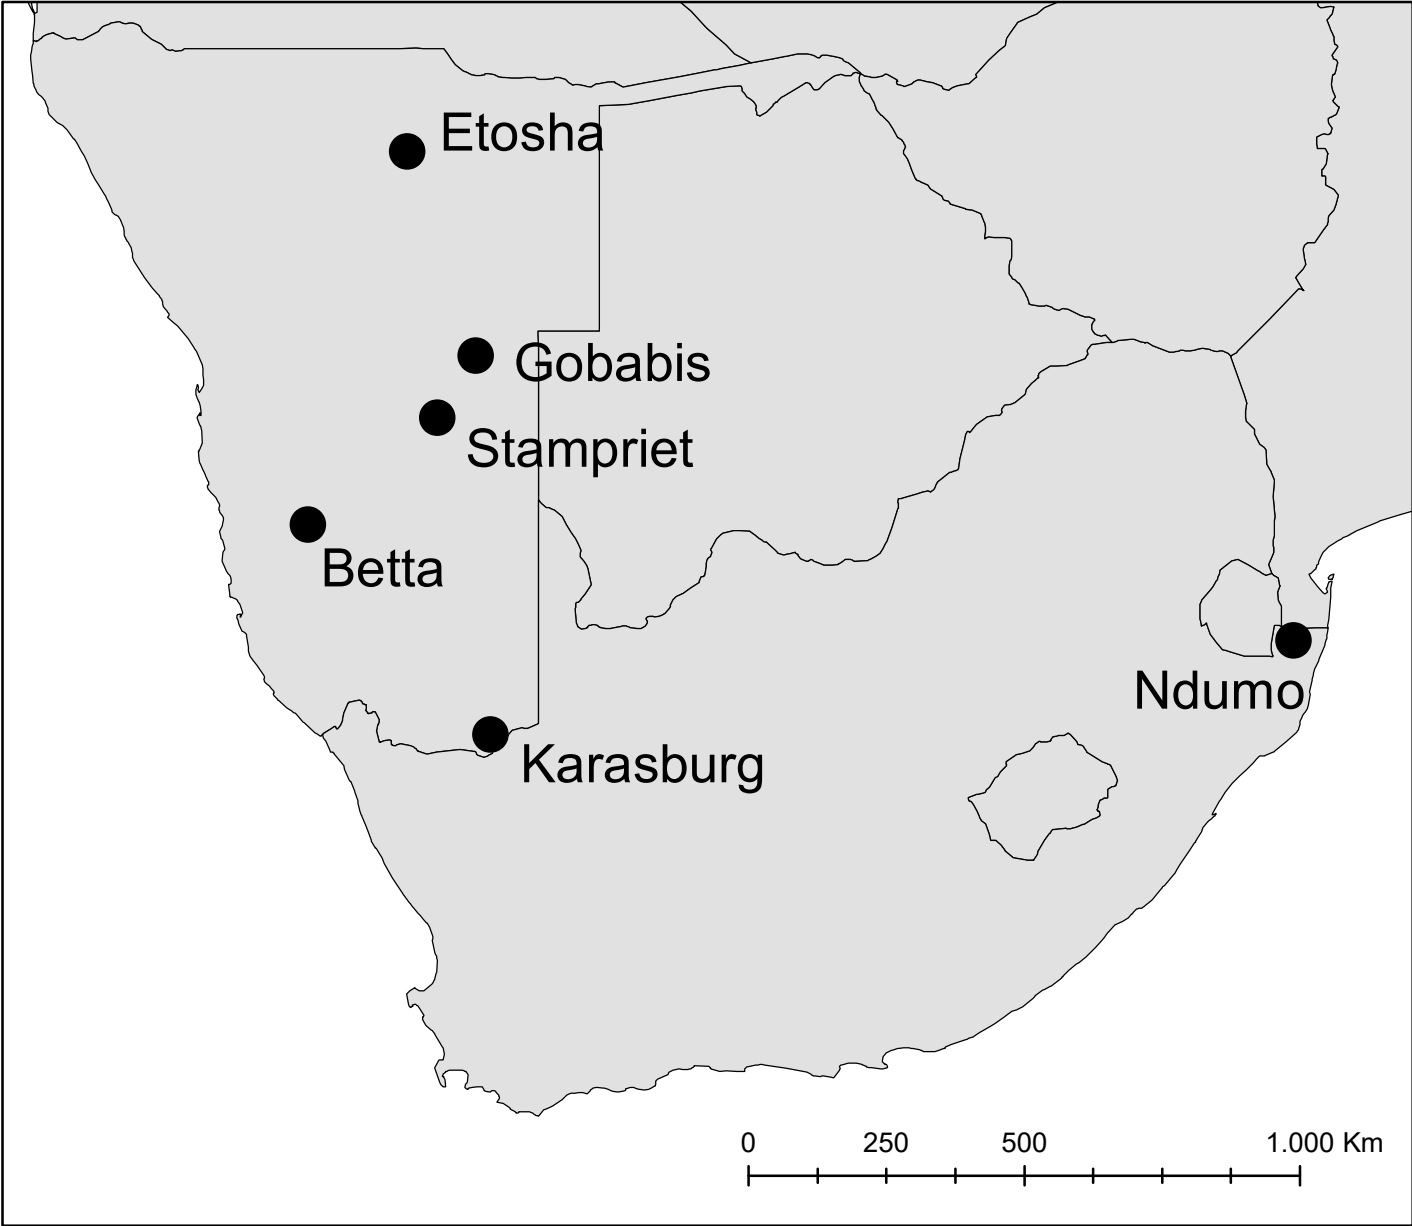

Supplement: s2 [file s2]
