# Supplementary material for: DNA Methylation Patterns in the Social Spider, Stegodyphus dumicola
Source: MDPI journal article supplement (doi:10.3390/genes10020137), 2019-02-12

## Figure S9

Correlation of CpG <sub>O/E</sub> of protein coding genes found to be orthologs in *S. duminicola* and *S. mimosarum* using a best reciprocal blast approach.



# CpG O/E of ortholog genes

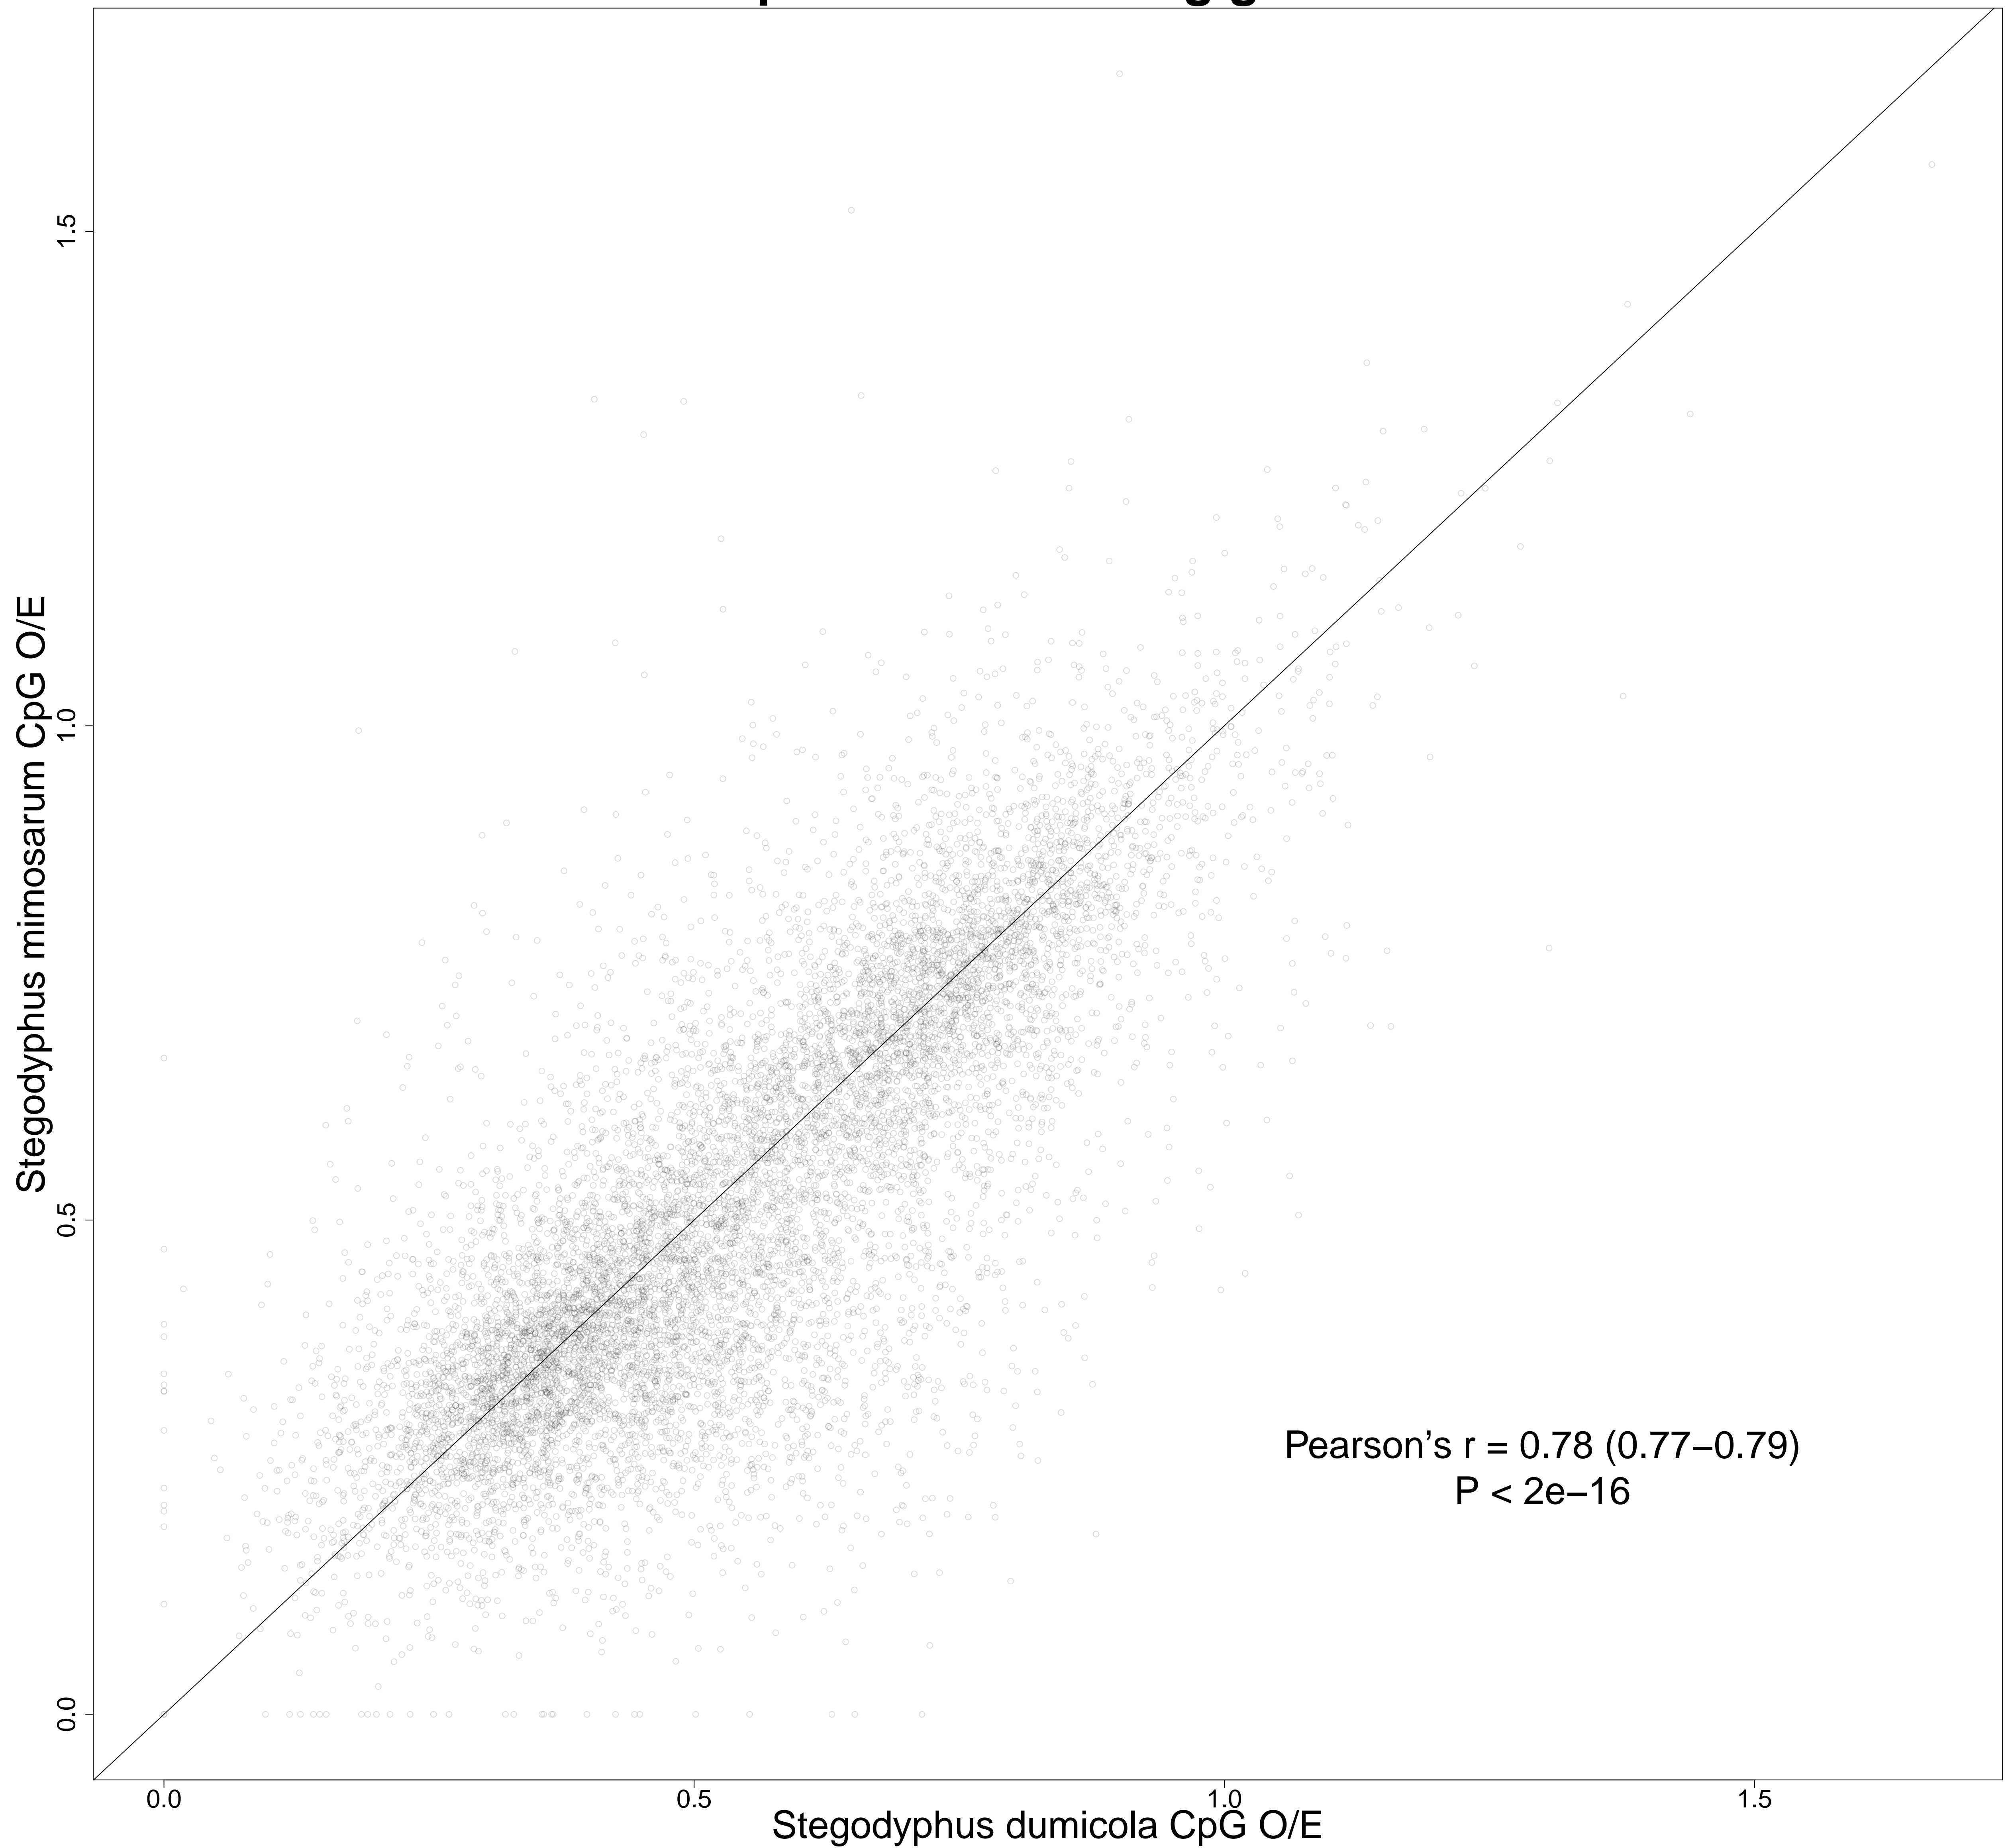

Supplement: s2 [file s2]
