# Supplementary material for: DNA Methylation Patterns in the Social Spider, Stegodyphus dumicola
Source: MDPI journal article supplement (doi:10.3390/genes10020137), 2019-02-12

## Figure S2

Defining the criteria for filtering the contigs generated by SparseAssembler. Contigs are plotted according to their lengths (x-axis, log-scaled) and their depths (y-axis, log-scaled). For the ease of illustration, only a random subset (10000) of the contigs are presented here. Blue lines show the criteria for filtering, i.e., depth between 14 and 40 and length  $> 300$  bp.

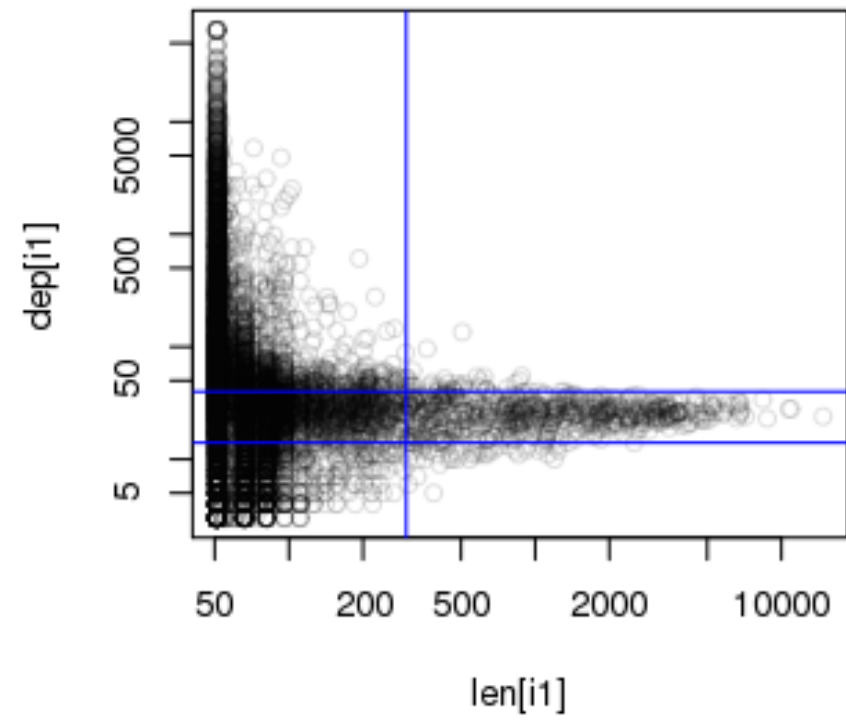

Supplement: s2 [file s2]
