# Supplementary figures and images for: DNA Methylation Patterns in the Social Spider, Stegodyphus dumicola
Source: MDPI journal article supplement (doi:10.3390/genes10020137), 2019-02-12

Figure S4

K-mer depth distribution of the filtered Illumina reads of the WG-I dataset.

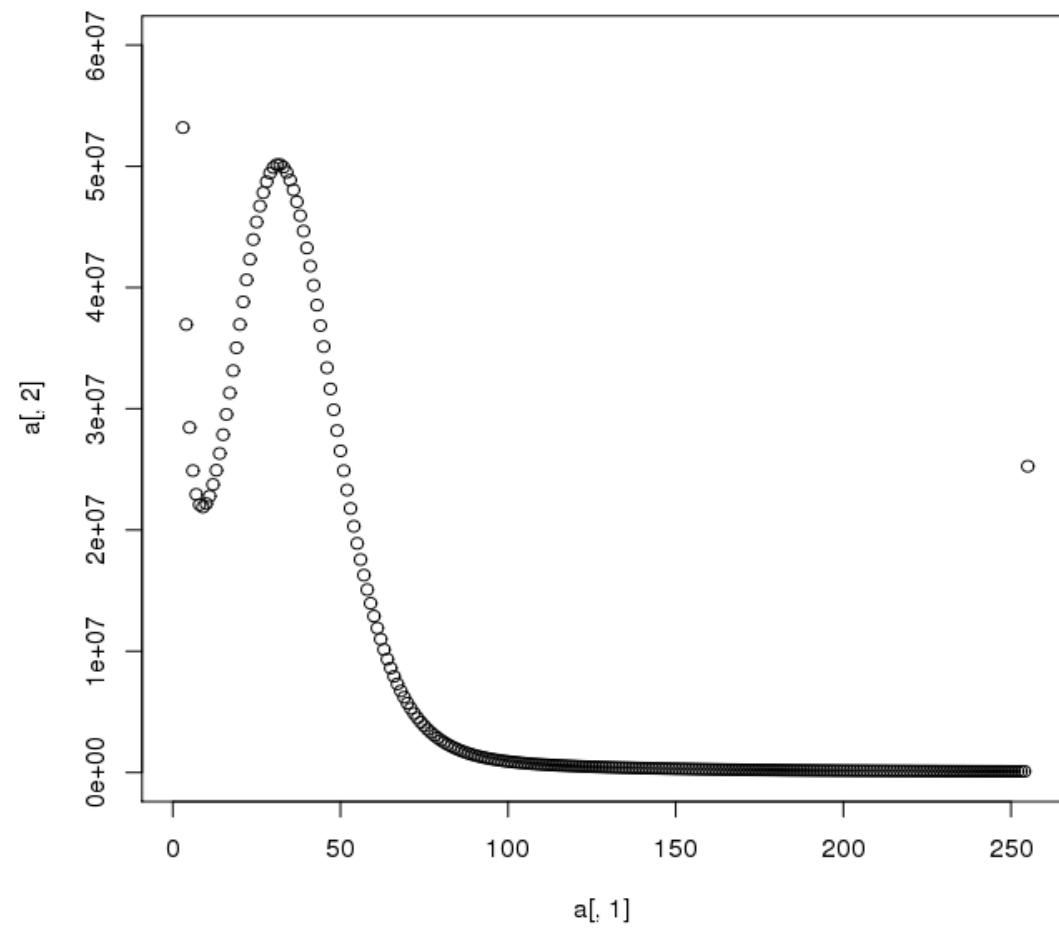

Supplement: s2 [file s2]
